1 **IN**frastructure for a **PHA**ge **RE**ference **D**atabase: Identification of large-scale biases in the  
2 current collection of phage genomes

3

4 Ryan Cook<sup>1</sup>, Nathan Brown<sup>2</sup>, Tamsin Redgwell<sup>3</sup>, Branko Rihtman<sup>4</sup>, Megan Barnes<sup>2</sup>, Martha  
5 Clokie<sup>2</sup>, Dov J. Stekel<sup>5</sup>, Jon Hobman<sup>5</sup>, Michael A. Jones<sup>1</sup>, Andrew Millard<sup>2\*</sup>

6

7 <sup>1</sup> School of Veterinary Medicine and Science, University of Nottingham, Sutton Bonington  
8 Campus, College Road, Loughborough, Leicestershire, LE12 5RD, UK

9 <sup>2</sup> Dept Genetics and Genome Biology, University of Leicester, University Road, Leicester,  
10 Leicestershire, LE1 7RH, UK

11 <sup>3</sup> COPSAC, Copenhagen Prospective Studies on Asthma in Childhood, Herlev and Gentofte  
12 Hospital, University of Copenhagen, Copenhagen, Denmark

13 <sup>4</sup> University of Warwick, School of Life Sciences, Coventry, UK

14 <sup>5</sup> School of Biosciences, University of Nottingham, Sutton Bonington Campus, College Road,  
15 Loughborough, Leicestershire, LE12 5RD,

16

17 Corresponding author: adm39@le.ac.uk

18 **Abstract**

19 **Background**

20 With advances in sequencing technology and decreasing costs, the number of  
21 bacteriophage genomes that have been sequenced has increased markedly in the last  
22 decade.

23 **Materials and Methods**

24 We developed an automated retrieval and analysis system for bacteriophage genomes,  
25 INPHARED (<https://github.com/RyanCook94/inphared>), that provides data in a consistent  
26 format.

27 **Results**

28 As of January 2021, 14,244 complete phage genomes have been sequenced. The data set is  
29 dominated by phages that infect a small number of bacterial genera, with 75% of phages  
30 isolated only on 30 bacterial genera. There is further bias with significantly more lytic phage  
31 genomes than temperate within the database, resulting in ~54% of temperate phage  
32 genomes originating from just three host genera. Within phage genomes, putative antibiotic  
33 resistance genes were found in higher frequencies in temperate phages than lytic phages.

34 **Conclusion**

35 We provide a mechanism to reproducibly extract complete phage genomes and highlight  
36 some of the biases within this data, that underpins our current understanding of phage  
37 genomes.

38

39 Keywords: phage genomes, antibiotic resistance genes, virulence genes, jumbo-phages

## 40 Introduction

41 Bacteriophages (hereafter phages), are viruses that specifically infect bacteria and are  
42 thought to be the most abundant biological entities in the biosphere (1). In the oceans they  
43 are important in diverting the flow of carbon into dissolved and particulate organic matter  
44 via the lysis of their hosts (1), or directly halting the fixation of CO<sub>2</sub> carried out by their  
45 cyanobacterial hosts (2). In the human microbiome, it is becoming increasingly clear that  
46 phages play a role in a range of different diseases. Many recent studies have shown disease-  
47 specific alterations to the gut virome community in both gastrointestinal and systemic  
48 conditions, including irritable bowel disease (3), AIDs (4), malnutrition (5), and diabetes (6).

49

50 Phages alter the physiology of their hosts such that their bacterial hosts display increased  
51 virulence, a notable example being phage CTX into the genome of *Vibrio cholerae*, resulting  
52 in cholera (7). However, there are many cases where the expression of phage-encoded  
53 toxins cause an otherwise harmless commensal bacterium to convert into a pathogen,  
54 including multi-drug resistant ST11 strains of *Pseudomonas aeruginosa* (8, 9), and the Shiga-  
55 toxin encoding *Escherichia coli* (10). As well as increasing the virulence of the host bacteria,  
56 phages can also utilise parts of their genomes known as auxiliary metabolic genes (AMGs),  
57 homologues of host metabolic genes, to modulate their hosts metabolism (11).

58

59 Our understanding of how phages alter host metabolism has increased in conjunction with  
60 the number of phage genomes that have been sequenced, following sequencing of the first  
61 phage genome in 1977 (12). Since then, the number of phages that are isolated and the  
62 relative ease of high-throughput sequencing has led to a rapid increase in the number of  
63 sequenced bacteriophage genomes (13). The relatively simple nature of phage genomes

64 means that the vast majority of isolated phage genomes can be completely assembled using  
65 short-read next generation sequencing (14). The greater number of phage genomes  
66 available results in common analyses, including comparative genomic analyses (15, 16),  
67 taxonomic classification of phages (17–20), forming the basis of software to predict new  
68 phages (21–26), and as is often the first step in analysis of viromes, the comparison of  
69 sequences to a known database.

70

71 To do all of the above requires a comprehensive set of complete phage genomes from  
72 cultured isolates that can be used to build databases for further analyses. It also raises the  
73 question of how many complete phage genomes are currently available. While this should  
74 be relatively trivial question to answer, it is not very simple to do so, as there is currently no  
75 such database of all complete phage genomes. Therefore, the aim of this work was to  
76 provide a reproducible and automated way to extract complete phage genomes from  
77 GenBank and identify general properties within the data and limitations.

78

## 79 **Materials and Methods**

80 Bacteriophage genomes were download using the “PHG” identifier along with minimum and  
81 maximum length cut-offs. Genomes were then filtered based on several parameters to  
82 identify complete and near complete phage genomes. This includes initial searching for the  
83 term “Complete” & “Genome” in the phage description, followed by “Complete” &  
84 (“Genome” or “Sequence”) & a genome length of greater than 10 kb. The list of genomes  
85 was then manually curated to identify obviously incomplete phage genomes, with the  
86 process on going. The accessions of these are then excluded in future iterations by the use  
87 of an exclusion list, which can be added to by the community via GitHub. Whilst this process

88 is not perfect, we thank numerous people that have identified genomes within this list that  
89 are obviously incomplete. The initial search term for downloading genomes was: *esearch -*  
90 *db nucleotide -query "gbdiv\_PHG[prop]" | efilter -query "1417:800000 [SLEN] " | efetch -*  
91 *format gb > \$phage\_db.gb*. An exclusion list of phage genomes that are automatically called  
92 “complete”, yet when manually checked are not is continually being updated.

93

94 After filtering, genes are called using Prokka with the `–noanno` flag, with a small number of  
95 phages using `–gcode 15` (27, 28). Gene calling was repeated to provide consistency across all  
96 genomes, which is essential for comparative genomics. A database is provided so that this  
97 process does not continually have to be rerun and only new genomes are added. The  
98 original GenBank files are used to gather useful metadata including taxa and bacterial host,  
99 and the Prokka output files are used to gather data relating to genomic features. The  
100 gathered data are summarised in a tab-delimited file that includes the following: accession  
101 number, description of the phage genome, GenBank classification, genome length (bp),  
102 molGC (%), modification date, number of CDS, proportion of CDS on positive sense strand  
103 (%), proportion of CDS on negative sense strand (%), coding capacity (%), number of tRNAs,  
104 bacterial host, viral genus, viral sub-family, viral family, and the lowest viral taxa available  
105 (from genus, sub-family and family). Coding capacity was calculated by comparing the  
106 genome length to the sum length of all coding features within the Prokka output, and tRNAs  
107 were identified by the use of tRNA tag. Other outputs include a fasta file of all phage  
108 genomes, a MASH index for rapid comparison of new sequences, vConTACT2 input files, and  
109 various annotation files for IToL and vConTACT2. The vConTACT2 input files produced from  
110 the script were processed using vConTACT2 v0.9.13 with `--rel-mode Diamond --db 'None' --`

111 pcs-mode MCL --vcs-mode ClusterONE --min-size 1 and the resultant network was visualised  
112 using Cytoscape v3.8.0 (29, 30).

113

114 To identify genes indicative of a temperate lifestyle within genomes, we used a set of PFAM  
115 HMMs as described previously (31). If a genome encoded one of these genes, it was  
116 assumed to be temperate. Antimicrobial resistance genes (ARGs) and virulence factors were  
117 identified using Abricate with the resfinder and VFDB databases using 95% identity and 75%  
118 coverage cut-offs (32–34).

119

120 The phylogeny of “jumbo-phages” was constructed from the amino acid sequence of the  
121 TerL protein, extracted from 313/314 of the “jumbo-phage” genomes. Sequences were  
122 queried against a database of proteins from non-“jumbo-phages” using Blastp and the top  
123 five hits were extracted (35) with redundant sequences being removed. Sequences were  
124 aligned with MAFFT, with a phylogenetic tree being produced using IQ-Tree with “-m WAG -  
125 bb 1000” which was visualised using IToL (36–38). Additional information was overlaid using  
126 IToL templates that are generated via INPHARED.

127

128 Rarefaction analysis was carried out for phage genomes from the top ten most common  
129 hosts (70% ID over 95% length) and species (95% ID over 95% length) using ClusterGenomes  
130 v5.1 (39). An additional set of these genomes pooled together was included. Rarefaction  
131 curves and species richness estimates were produced using Vegan in R (40, 41).

132

133 All data from January 2021 is available at Figshare

134 <https://doi.org/10.25392/leicester.data.14242085> and the script used for downloading and

135 analysing genomes is available on GitHub <https://github.com/RyanCook94/>.

136 **Results**

137 The output of the INPHARED script provides a set of complete phage genomes, whereby  
138 genes have been called in a consistent manner that allows comparative genomics and  
139 phylogenetic analysis. In addition, it provides a MASH database to allow rapid comparison of  
140 new phage genomes against to identify close relatives. Along with formatted databases for  
141 input into vConTACT2 to allow identification of more distant relatives. The host data (Genus)  
142 for each phage is extracted along with summary information for each genome, which is  
143 reformatted to allow overlay onto trees in ITOL (See Supplementary Figure 1 for full details).

144

145 For this study, we used a lenient definition of “complete” for the identification of complete  
146 phage genomes. Strictly speaking a complete phage genome would include the terminal  
147 ends of the phage genome. As many phages are sequenced using a transposon based library  
148 preparation (16, 42), the genome can never be complete as the terminal bases can never be  
149 sequenced, unless it is circularly permuted (14). For phage genomes with long terminal  
150 repeats, if the length of the repeat is larger than the library insert size, these cannot be  
151 resolved. As this information is not included in every GenBank file, automated retrieval is  
152 not possible.

153

154 We next set about identifying how many phage genomes have been sequenced to date. The  
155 extraction of genomes from the nucleotide database of GenBank results in 18,134 genomes.  
156 Of these, 3,890 phage genomes are REFSEQ entries which are derived from primary  
157 submissions, resulting in 14,244 putative complete phage genomes. Current  
158 recommendations are that phages are uniquely named (43), if this assumption is true then  
159 number of unique phage genomes is 12,127 if phages with the same name are truly



160 identical. However, there are multiple examples of phages with the same name. In some  
161 cases this is the same phage being re-sequenced due to experimental evolution studies such  
162 as *E. coli* phiX (44) . In other instances, phages with the same name are not genetically  
163 identical. Thus, using a phage name as a means to identify different phages is not a suitable  
164 method for determining the number of unique phage genomes. As an alternative, de-  
165 duplication of genomes at 100%, 97% and 95% identity results in 13,830, 12,845 and 12,770  
166 genomes respectively.

167

168 Having established a dataset of “complete” phage genomes, we then analysed this data to  
169 look at general phage genomic properties. First, we looked at the increase in the number of  
170 phage genomes that are sequenced over time. Whilst the number of phage genomes has  
171 rapidly increased over the last 20 years, the rate of increase has slowed in the last decade  
172 (Figure 1), with the number of phage genomes doubling every 2-3 years.

173

#### 174 **Bacteriophage Hosts and Predicted Gene Function**

175 Utilising the database of complete genomes, we extracted the hosts and predicted number  
176 of hypothetical proteins for each phage. Across all phages, the majority of genes which  
177 encode proteins with unknown function (hypothetical) was mean 56% (+/- 20), supporting  
178 the truism that the majority of genes encode proteins within unknown function.

179

180 The host of 12,403 phages were extracted with the remainder unknown as the host was not  
181 clear from the information contained within the GenBank file alone. The genomes of phages  
182 infecting 234 hosts have been sequenced. However, there is a clear bias in the isolation of  
183 phages against the same host (Figure 2a). Phages that infect *Mycobacterium* spp. are the

184 most commonly deposited genomes (~13%), largely due to the pioneering work of the SEA-  
185 PHAGES program (45), followed by *Escherichia* spp., *Streptococcus* spp., and *Pseudomonas*  
186 spp. (Figure 2a). Phages isolated on just 30 different bacterial genera accounts for ~75% of  
187 all phage genomes in the database (Supplementary Table 1). For genomes isolated against  
188 the top ten hosts, we used rarefaction analysis to gain an understanding of the diversity of  
189 phage genomes isolated to date and determine redundancy of phages isolated on a  
190 particular host. Using a cut-off of 95% identity to define a species, it was clearly observed  
191 the number of phage species continues to increase with the number of genomes  
192 sequenced, a pattern also observed at the level of genus (70% identity) (Figure 3). Using the  
193 current data, it was possible to estimate how many different species of phage might infect  
194 these different hosts (Supplementary Table 4). For *Mycobacterium*, for which most phages  
195 have isolated on, there are 695 observed species with an estimated 2132-2282 total species.  
196 Thus, demonstrating even for hosts where thousands of phages have been isolated, we are  
197 only just scratching the surface of the diversity of total phage diversity. We are also likely  
198 under estimating the total number of different phage species. In the case of phages  
199 infecting *Mycobacterium*, the majority of these have been isolated on only a single strain as  
200 part of the SEA-PHAGES program. Increasing the diversity of the host *Mycobacterium*, is  
201 likely to lead to higher estimates.

202

### 203 **Lytic and Temperate phages**

204 To identify if the phage is lytic or temperate, we searched for genes that facilitate a  
205 temperate lifestyle (e.g., integrase and recombinase) that have been used in previous  
206 studies. This process is not perfect, as the presence of an identifiable gene linked to  
207 temperate phages does not mean it will access a lysogenic cycle. However, it does allow

208 large scale comparative analyses, compared to the manual searching of literature of every  
209 phage compared to determine if it has been experimentally tested. Within the dataset,  
210 4,258 (~30%) phages have the potential to access a lysogenic lifecycle. The frequency of  
211 putative temperate phages was highly variable depending on the host (Supplementary  
212 Figure 2). The number of putative temperate phages is also biased towards a small number  
213 of hosts with 1,217, 846 and 214 isolated on *Mycobacterium*, *Streptococcus* and *Gordonia*  
214 respectively. Collectively these three hosts account for ~54% of all putative temperate  
215 phage genomes sequenced to date (Supplementary Figure 2).

216

### 217 **Genomic Properties**

218 Phage genomes ranged from 3.1 kb to 642.4 kb in size, with a clear distribution in the size of  
219 genomes with the most prominent peaks at 5-10 kb, 40 kb, 50 kb and ~165 kb (Figure 2b).  
220 The mean and median coding capacity was found to be 90.45% and 91.52%, respectively  
221 (Supplementary Figure 2). Of the 14,244 genomes, 5,731 (~40%) were found to have  $\geq 90\%$   
222 of coding features on one strand and 3,293 (~23%) of these had coding features entirely on  
223 one strand (Supplementary Figure 2). The number of phages with genes encoding tRNAs  
224 was 4,590 (~32%). For those phages encoding tRNAs, the range was 1 to 62 with a median of  
225 3. Whilst there is much literature on the presence of tRNAs in phages, it is still not clear  
226 entirely what role they provide to phages and why they absent in some phages and not  
227 others (46).

228

229 Phages with genomes greater than 200 kb are often referred to as “jumbo-phages” and are  
230 reported to be rarely isolated (47). 314 genomes (~2.2%) greater than 200 kb in length were  
231 identified, suggesting that they are rare. To further investigate if “jumbo-phages” are as rare

232 as is thought, we looked at the distribution in the context of the previously identified host  
233 bias. “Jumbo-phages” have only been isolated on 31 of 234 identifiable bacterial hosts  
234 (Supplementary Table 1) and are far more commonly isolated on some hosts than others.  
235 Noticeably absent are any “jumbo-phages” that infect *Mycobacterium*, *Gordonia*,  
236 *Lactococcus*, *Arthrobacter*, and *Streptococcus*, with >4,000 phages having been sequenced  
237 from these bacterial hosts (Figure 2c). For host bacteria that have had far fewer phages  
238 isolated on them such as *Caluobacter*, *Sphingomonas*, *Erwinia*, *Areomonas*, *Dickeya* and  
239 *Ralstonia*, the frequency of “jumbo-phage” isolation is far higher (Figure 2c). Due to the  
240 small sampling depth of some of these hosts (e.g., *Photobacterium* and *Tenacibaclum*), it is  
241 not possible to determine whether the high proportion of genomes is merely a result of the  
242 low number of genomes sequenced. However, for other hosts such as *Aeromonas*, *Erwinia*  
243 and *Caulobacter* from which more than 20 phages have been isolated, ~26%, ~44% and  
244 ~63% are categorised as “jumbo” respectively. Therefore suggesting “jumbo-phages” are  
245 not always rare on particular hosts.

246

247 We further investigated the phylogeny of “jumbo-phages” using the translated sequence of  
248 the *terL* gene. The “jumbo-phages” are well distributed across the tree and do not form a  
249 single monophyletic clade, suggesting that they have arisen on multiple occasions, with  
250 multiple clades of phages having representatives of “jumbo-phages” within them. Not all  
251 “jumbo-phages” are equal, with “jumbo” cyanophages infecting the cyanobacteria  
252 *Synechococcus* and *Prochlorococcus* only marginally larger than their non-jumbo  
253 cyanophages relatives. These “jumbo-phages” are also more closely related to their non-  
254 jumbo cyanophages relatives than other “jumbo-phages” (Figure 4). This is not limited to  
255 the cyanophages, with many other “jumbo-phages” more closely related to a non-jumbo

256 phage. A similar pattern of grouping non-jumbo with “jumbo-phages” is observed when a  
257 reticulate approach is used to look at the relatedness of phage genomes using vConTACT2  
258 (Supplementary Figure 3).

259

## 260 **Virulence Factors and Antimicrobial Resistance Genes**

261 The presence of ARGs and virulence factors is major concern for phage therapy, as the use  
262 of phages carrying such genes may make the populations of bacteria they are intended to  
263 kill more virulent or resistant to antibiotics. We therefore used this database to integrate  
264 the frequency and diversity of phage-encoded virulence factors and ARGs. 235 genomes  
265 (~1.6%) were found to encode a virulence factor and 43 genomes (~0.3%) to encode an  
266 ARG. The most common virulence genes were the *stx<sub>2A</sub>* (72 genomes) and *stx<sub>2B</sub>* (71  
267 genomes) genes that encode subtypes of the Shiga toxin (Supplementary Table 2). The most  
268 common ARGs were the *mef(A)* (14 genomes) and *msr(D)* genes which confer resistance to  
269 macrolide antibiotics (Supplementary Table 3) (48). Most genomes encoding a virulence  
270 factor were predicted to be from temperate phages (222/235), and were found to infect six  
271 bacterial genera, with the three most abundant hosts being *Streptococcus*, *Staphylococcus*  
272 and *Escherichia* respectively. The hosts for many genomes could not be determined  
273 (55/235). The virulence factor encoding genomes were widely distributed over 26 putative  
274 genera (Supplementary Figure 3). All genomes encoding an ARG were predicted to be  
275 temperate and were found to be isolated from eight bacterial genera, with the majority of  
276 phages linked to *Streptococcus* spp. (27/43).

277

## 278 **Discussion**

279 Defining how many different complete phage genomes have been sequenced is not a simple  
280 question as it might appear. Based on accession numbers, there are 14,244 phage genomes,  
281 once RefSeq duplicates have been removed. Using unique names results in 12,127 phages,  
282 however using names alone does not give an accurate estimate of the number of different  
283 phages, as genomically different phages have the same name. The use of de-duplication at  
284 100% identity suggests 13,830 unique phage genomes (January 2021) from cultured  
285 isolates. This assumes that the genome submissions are from isolates and not predictions of  
286 prophages from bacterial genomes. For the vast majority of phages, this appears to be case,  
287 although not easily discernible for all phage genomes.

288

289 The data reveals clear patterns in phage genomes and biases in the selection of phage  
290 genomes that are currently available, but not always discussed in the analysis of genomes.  
291 The first is the number of phage genomes is relatively small. Even for hosts where the  
292 highest number of phages have been isolated on, our estimates suggest 1000s of new phage  
293 species remain to isolated and sequenced. If we consider there are now more than 300,000  
294 assembled representative bacterial genomes in GenBank, with many hundreds of thousands  
295 more for particular genera e.g., >300,000 *Salmonella* and *Escherichia* genomes alone (49).  
296 The representation of phage genomes to date is tiny compared to their bacterial hosts.  
297 Furthermore, the rate at which phage genomes are being sequenced is slowing down rather  
298 than increasing. Given the renewed interest in phages and increased accessibility of  
299 sequencing, the decrease in the rate over time was surprising.

300

301 The second point of note is the bias in phage genomes. With a clear bias in both the hosts  
302 phages are isolated on and for lytic phages over temperate phages. Thus, these phages are

303 representative of these particular hosts, rather than phages in their entirety. Due to the  
304 enormous success of the SEA-PHAGES program, many phages have been isolated on  
305 *Mycobacterium* and *Gordonia* (50). This in turn results in  $\sim 1/3^{\text{rd}}$  of all temperate phage  
306 genomes being isolated on these two bacterial genera, whereas the remaining  $2/3^{\text{rds}}$  are  
307 distributed across 142 different hosts.

308

309 The overrepresentation of phages infecting particular hosts can lead to truisms that may not  
310 be correct. For instance, “jumbo-phages”, those that have genomes  $>200$  kb, are rarely  
311 isolated (47). Analysis of the complete dataset suggests  $\sim 2.2\%$  of genomes fall into this  
312 category. However, this needs to be viewed in the context of the large bias in the hosts used  
313 for isolation, with  $\sim 75\%$  of phages isolated on only  $\sim 16\%$  of bacterial hosts that could be  
314 identified. When the number of “jumbo-phages” is expressed as a percentage of all phage  
315 genomes, their isolation is clearly rare. For some hosts, such as *Mycobacterium*, many  
316 hundreds of phages isolated on the same host strain have been sequenced without the  
317 isolation of a “jumbo-phage”, suggesting they are truly rare for this host (45). However, for  
318 other hosts such as *Prochlorococcus*, *Synechococcus*, *Caulobacter*, and *Erwinia*, the  
319 isolation of “jumbo-phages” is not a rare event. While methodological adjustments of  
320 decreasing agar viscosity and large pore size filters may increase the number of phages  
321 isolated that have larger genome sizes (47), we suggest that using a wider variety of hosts  
322 may increase the number of “jumbo-phages” isolated. Phylogenetic analysis demonstrated  
323 many “jumbo-phages” are more closely related to non-jumbo phages than other “jumbo-  
324 phages”. Thus, as the number of phage genomes has increased an arbitrary descriptor or  
325 “jumbo” for phages with genomes over 200 kb in length has less meaning. Recent  
326 comparative analysis of 224 “jumbo-phages”, used proteome size and analysis of protein

327 length to determine a cut-off of 180 kb to separate “jumbo-phages”, from other phages.  
328 From this using a clustering-based approach, three major clades of “jumbo-phages” were  
329 identified (51). In this study using *terL* as a phylogenetic marker to determine the phylogeny  
330 of 313 “jumbo-phages” and their closely related phages, suggests they have arisen on  
331 multiple occasions, as has been demonstrated previously (51). “Jumbo-phages” are clearly  
332 not monophyletic and what applies to one “jumbo-phage” does not hold true for many  
333 others (51). As the number and diversity of “jumbo-phages” increases, the use of the term  
334 seems to have less meaning.

335

336 With the increasing interest and use of phages for therapy, the isolation of phages that do  
337 not contain known virulence factors or ARGs is imperative. How frequently phages encode  
338 antibiotic resistance genes is a topic of much debate (52, 53). A previous study of 1,181  
339 phage genomes found that they are rarely encoded by phages with only 13 candidate genes,  
340 of which four were experimentally tested and found to have no functional antibiotic  
341 activity (47). We estimate ~0.3% of phage genomes encode a putative ARG (none have been  
342 experimentally tested), a finding that is consistent with previous reports of low-level  
343 carriage in phage genomes (52) in a dataset that is ~10x larger using similarly stringent cut-  
344 offs. Critically, all of these ARGs were found in phages that are predicted to be temperate or  
345 have been engineered to carry ARGs as a marker for selection. With the frequency of  
346 carriage in temperate phages being ~1% overall. However, this data is still biased by the  
347 majority of temperate phages being isolated on only three bacterial genera. Notably no  
348 ARGs were detected on phages of *Mycobacterium*, which accounts for ~28 % of temperate  
349 phages. In comparison, ~2.6% (27/1055) of temperate phages of *Streptococcus* carry  
350 putative ARGs and 50% of phages from *Erysipelothrix* (1/2). Clearly a much deeper sampling



351 of temperate phages from a broader range of hosts is required to get an accurate  
352 understanding of the role of phage in the carriage of ARGs. Based on the skewed data  
353 available to date, it seems unlikely there will be issues in the isolation of lytic phages for  
354 therapeutic use that contain known ARG within their genomes. However, we cannot  
355 determine whether these lytic phages cannot spread ARGs via transduction, or through  
356 carriage of as-yet uncharacterised ARGs.

357

358 Whilst there is much debate on the presence and importance of ARGs in phage genomes,  
359 the role of genes encoding virulence factors is well studied and the process of lysogenic  
360 conversion well known (7–10). However, how widespread known virulence genes are in  
361 phages is not widely reported. We estimate 1.6% of phages encode at least one putative  
362 virulence factor, with the frequency of carriage far higher in temperate phages (5.5%) than  
363 lytic phages (0.13%). Again, these overall percentages are skewed by host bias with no  
364 known virulence factors detected in *Mycobacterium* temperate phages (0/1217), in  
365 comparison 72% of temperate phages of *Shigella* (5/7) and 7% (61/846) of *Streptococcus*  
366 contain virulence factors. It is currently impossible to determine if the higher proportion of  
367 ARGs and virulence factors in phages of known pathogens is a feature of their biology, or a  
368 skew in the database towards phages of clinically relevant isolates.

369

370 Given the biases in the dataset, it is not clear if the general phage patterns we observe (e.g.,  
371 jumbo-phages are rarely isolated, more temperate phages on particular hosts, and the  
372 carriage of ARGs and virulence genes) are linked to biology or chronic under sampling of  
373 phage genomes. We speculate that currently is most likely the latter, which distorts some  
374 generalisations about phages. It clear that jumbo-phages are not rare on some hosts and

375 putative ARGs are far more abundant on temperate phages. However, far deeper sampling  
376 of phage diversity across different hosts is required at an increasing rate.

377

### 378 **Conclusions**

379 We have provided a simple method to automate the download of curated set of complete  
380 genomes from cultured phage isolates, providing metadata in a format that can be used as a  
381 starting point for many common analyses. Analysis of the current data highlights what we  
382 know about phage genomes is skewed by the majority of phages having been isolated from  
383 a small number of bacterial genera. Furthermore, the rate at which phage genomes are  
384 being deposited is decreasing. Whilst understanding of genomic diversity is always  
385 influenced by the data available, this is particularly acute for phage genomes with so many  
386 phages isolated on smaller number of hosts. To obtain a greater understanding of phage  
387 diversity, larger numbers of phages, in particular temperate phages, isolated from a broader  
388 range of bacteria need to be sequenced.

389

390

### 391 **Acknowledgments**

392

### 393 **Authorship Confirmation Statement**

### 394 **Competing Interests.**

### 395 **Funding**

396 R.C is supported by a scholarship from the Medical Research Foundation National PhD Training  
397 Programme in Antimicrobial Resistance Research (MRF-145-0004-TPG-AVISO). A.M, D.J.S, M.J, and  
398 J.H were supported by NERC (NE/N019881/1). A.M was supported by MRC  
399 (MR/T030062/1 and [MR/L015080/1](#))

400

401 **Figure 1**

402 Number of complete phage genomes in GenBank over time. Dates were estimated based on date of  
403 submission (\* for 235 genomes, the date of update was used as no submission date was available).  
404 The reference lines showing doubling rates (dashed) begin in 1989, as this is when the number of  
405 phage genomes increased beyond the first submission in 1982.

406

407 **Figure 2**

408 Overall properties of phages. A) Proportion of phages isolated on the top 30 most abundant hosts. B)  
409 Distribution of phage genome sizes. C) Proportion of “jumbo-phages” on top 30 hosts for which at  
410 least one “jumbo-phage” has been isolated.

411

412 **Figure 3**

413 Genomic diversity of phages on the top ten most abundant hosts. A) Rarefaction curve of phage  
414 species. Species were defined as 95% identity over 95% of genome length. B) Rarefaction curve of  
415 phage genera. Genera were defined as 70% identity over 95% of genome length.

416

417 **Figure 4**

418 Phylogenetic tree of translated terL gene for 313 “jumbo-phages” and their closest relatives. The  
419 alignment was produced using MAFFT (36) and tree produced using IqTree using WAG model with  
420 1000 bootstrap repeats (37). Pink shaded regions indicate “jumbo-phages”, coloured ring indicates  
421 viral genus, and blue bars indicate genome length. Bootstrap values indicated by black circles are  
422 shown with a minimum of 70%.

423

424 **References**

- 425 1. Suttle CA. 2007. Marine viruses--major players in the global ecosystem. *Nat Rev Microbiol*  
426 5:801–12.
- 427 2. Puxty RJ, Millard AD, Evans DJ, Scanlan DJ. 2016. Viruses inhibit CO<sub>2</sub> fixation in the most  
428 abundant phototrophs on Earth. *Curr Biol* 26:1585–1589.
- 429 3. Norman JM, Handley SA, Baldridge MT, Droit L, Liu CY, Keller BC, Kambal A, Monaco CL, Zhao  
430 G, Fleshner P, Stappenbeck TS, McGovern DPB, Keshavarzian A, Mutlu EA, Sauk J, Gevers D,  
431 Xavier RJ, Wang D, Parkes M, Virgin HW. 2015. Disease-specific alterations in the enteric  
432 virome in inflammatory bowel disease. *Cell* <https://doi.org/10.1016/j.cell.2015.01.002>.
- 433 4. Monaco CL, Gootenberg DB, Zhao G, Handley SA, Ghebremichael MS, Lim ES, Lankowski A,  
434 Baldridge MT, Wilen CB, Flagg M, Norman JM, Keller BC, Luévano JM, Wang D, Boum Y,  
435 Martin JN, Hunt PW, Bangsberg DR, Siedner MJ, Kwon DS, Virgin HW. 2016. Altered Virome  
436 and Bacterial Microbiome in Human Immunodeficiency Virus-Associated Acquired  
437 Immunodeficiency Syndrome. *Cell Host Microbe*  
438 <https://doi.org/10.1016/j.chom.2016.02.011>.
- 439 5. Reyes A, Blanton L V., Cao S, Zhao G, Manary M, Trehan I, Smith MI, Wang D, Virgin HW,  
440 Rohwer F, Gordon JI. 2015. Gut DNA viromes of Malawian twins discordant for severe acute  
441 malnutrition. *Proc Natl Acad Sci U S A* <https://doi.org/10.1073/pnas.1514285112>.
- 442 6. Ma Y, You X, Mai G, Tokuyasu T, Liu C. 2018. A human gut phage catalog correlates the gut  
443 phageome with type 2 diabetes. *Microbiome* <https://doi.org/10.1186/s40168-018-0410-y>.
- 444 7. Waldor MK, Mekalanos JJ. 1996. Lysogenic Conversion by a Filamentous Phage Encoding  
445 Cholera Toxin. *Science (80- )* <https://doi.org/10.1126/science.272.5270.1910>.
- 446 8. van Belkum A, Soriaga LB, LaFave MC, Akella S, Veyrieras J-B, Barbu EM, Shortridge D, Blanc  
447 B, Hannum G, Zambardi G, Miller K, Enright MC, Mugnier N, Brami D, Schicklin S, Felderman  
448 M, Schwartz AS, Richardson TH, Peterson TC, Hubby B, Cady KC. 2015. Phylogenetic  
449 Distribution of CRISPR-Cas Systems in Antibiotic-Resistant &quot;named-

- 450 content genus-species" id="named-content-1"&gt;Pseudomonas  
451 aeruginosa</span>; MBio 6:e01796-15.
- 452 9. Tsao Y-F, Taylor VL, Kala S, Bondy-Denomy J, Khan AN, Bona D, Cattoir V, Lory S, Davidson AR,  
453 Maxwell KL. 2018. Phage Morons Play an Important Role in *Pseudomonas aeruginosa*  
454 Phenotypes. *J Bacteriol* 200:e00189-18.
- 455 10. O'Brien AD, Newland JW, Miller SF, Holmes RK, Smith HW, Formal SB. 1984. Shiga-like toxin-  
456 converting phages from *Escherichia coli* strains that cause hemorrhagic colitis or infantile  
457 diarrhea. *Science* (80- ) <https://doi.org/10.1126/science.6387911>.
- 458 11. Breitbart M, Thompson LR, Suttle CA, Sullivan MB. 2007. Exploring the vast diversity of  
459 marine viruses. *Oceanography* 20:135–139.
- 460 12. Sanger F, Air GM, Barrell BG, Brown NL, Coulson AR, Fiddes CA, Hutchison CA, Slocombe PM,  
461 Smith M. 1977. Nucleotide sequence of bacteriophage phi X174 DNA. *Nature*.
- 462 13. Perez Sepulveda B, Redgwell T, Rihtman B, Pitt F, Scanlan DJ, Millard A. 2016. Marine phage  
463 genomics: the tip of the iceberg. *FEMS Microbiol Lett* 363:fnw158.
- 464 14. Rihtman B, Clokie MRJ, Koskella B, Millard AD. MS. 2016. Assessing Illumina technology for  
465 the high-throughput sequencing of bacteriophage genomes. *PeerJ*.
- 466 15. Javan RR, Ramos-Sevillano E, Akter A, Brown J, Brueggemann A. 2018. Prophages and satellite  
467 prophages are widespread among *Streptococcus* species and may play a role in  
468 pneumococcal pathogenesis. *bioRxiv* 502740.
- 469 16. Michniewski S, Redgwell T, Grigonyte A, Rihtman B, Aguilo-Ferretjans M, Christie-Oleza J,  
470 Jameson E, Scanlan DJ, Millard AD. 2019. Riding the wave of genomics to investigate aquatic  
471 coliphage diversity and activity. *Environ Microbiol* 2019/04/04. 21:2112–2128.
- 472 17. Barylski J, Enault F, Dutilh BE, Schuller MB, Edwards RA, Gillis A, Klumpp J, Knezevic P,  
473 Krupovic M, Kuhn JH, Lavigne R, Oksanen HM, Sullivan MB, Jang H Bin, Simmonds P,  
474 Aiewsakun P, Wittmann J, Tolstoy I, Brister JR, Kropinski AM, Adriaenssens EM. 2019. Analysis  
475 of Spounaviruses as a Case Study for the Overdue Reclassification of Tailed Phages. *Syst Biol*

- 476 0:1–14.
- 477 18. Chibani CM, Farr A, Klama S, Dietrich S, Liesegang H. 2019. Classifying the Unclassified: A  
478 Phage Classification Method. *Viruses* 11:195.
- 479 19. Rohwer F, Edwards R. 2002. The phage proteomic tree: A genome-based taxonomy for  
480 phage. *J Bacteriol* <https://doi.org/10.1128/JB.184.16.4529-4535.2002>.
- 481 20. Adriaenssens EM, Wittmann J, Kuhn JH, Turner D, Sullivan MB, Dutilh BE, Jang H Bin, van Zyl  
482 LJ, Klumpp J, Lobočka M, Moreno Switt AI, Rumnieks J, Edwards RA, Uchiyama J, Alfenas-  
483 Zerbini P, Petty NK, Kropinski AM, Barylski J, Gillis A, Clokie MRC, Prangishvili D, Lavigne R,  
484 Aziz RK, Duffy S, Krupovic M, Poranen MM, Knezevic P, Enault F, Tong Y, Oksanen HM,  
485 Rodney Brister J. 2018. Taxonomy of prokaryotic viruses: 2017 update from the ICTV Bacterial  
486 and Archaeal Viruses Subcommittee. *Arch Virol* 163:1125–1129.
- 487 21. Ren J, Ahlgren NA, Lu YY, Fuhrman JA, Sun F. 2017. VirFinder: a novel k-mer based tool for  
488 identifying viral sequences from assembled metagenomic data. *Microbiome* 5:69.
- 489 22. Ren J, Song K, Deng C, Ahlgren NA, Fuhrman JA, Li Y, Xie X, Sun F. 2018. Identifying viruses  
490 from metagenomic data by deep learning.
- 491 23. Roux S, Enault F, Hurwitz BL, Sullivan MB. 2015. VirSorter: mining viral signal from microbial  
492 genomic data. *PeerJ* 3:e985.
- 493 24. Akhter S, Aziz RK, Edwards R a. 2012. PhiSpy: A novel algorithm for finding prophages in  
494 bacterial genomes that combines similarity-and composition-based strategies. *Nucleic Acids*  
495 *Res* 40:1–13.
- 496 25. Arndt D, Marcu A, Liang Y, Wishart DS. 2017. PFAST, PHASTER and PHASTEST: Tools for  
497 finding prophage in bacterial genomes. *Brief Bioinform* 1–8.
- 498 26. Bolduc B, Jang H Bin, Doucier G, You Z-Q, Roux S, Sullivan MB. 2017. vConTACT: an iVirus tool  
499 to classify double-stranded DNA viruses that infect *Archaea* and *Bacteria*. *PeerJ* 5:e3243.
- 500 27. Seemann T. 2014. Prokka: Rapid prokaryotic genome annotation. *Bioinformatics* 30:2068–  
501 2069.

- 502 28. Devoto AE, Santini JM, Olm MR, Anantharaman K, Munk P, Tung J, Archie EA, Turnbaugh PJ,  
503 Seed KD, Blehman R, Aarestrup FM, Thomas BC, Banfield JF. 2019. Megaphages infect  
504 Prevotella and variants are widespread in gut microbiomes. *Nat Microbiol*  
505 <https://doi.org/10.1038/s41564-018-0338-9>.
- 506 29. Bin Jang H, Bolduc B, Zablocki O, Kuhn JH, Roux S, Adriaenssens EM, Brister JR, Kropinski AM,  
507 Krupovic M, Lavigne R, Turner D, Sullivan MB. 2019. Taxonomic assignment of uncultivated  
508 prokaryotic virus genomes is enabled by gene-sharing networks. *Nat Biotechnol* 37:632–639.
- 509 30. Shannon P, Markiel A, Ozier O, Baliga NS, Wang JT, Ramage D, Amin N, Schwikowski B, Ideker  
510 T. 2003. Cytoscape: A software environment for integrated models of biomolecular  
511 interaction networks. *Genome Res* 13:2498–2504.
- 512 31. Cook R, Hooton S, Trivedi U, King L, Dodd CER, Hobman JL, Stekel DJ, Jones MA, Millard AD.  
513 2021. Hybrid assembly of an agricultural slurry virome reveals a diverse and stable  
514 community with the potential to alter the metabolism and virulence of veterinary pathogens.  
515 *Microbiome* 9:65.
- 516 32. Chen L, Zheng D, Liu B, Yang J, Jin Q. 2016. VFDB 2016: hierarchical and refined dataset for big  
517 data analysis--10 years on. *Nucleic Acids Res* 2015/11/17. 44:D694–D697.
- 518 33. Zankari E, Hasman H, Cosentino S, Vestergaard M, Rasmussen S, Lund O, Aarestrup FM,  
519 Larsen MV. 2012. Identification of acquired antimicrobial resistance genes. *J Antimicrob*  
520 *Chemother* 2012/07/10. 67:2640–2644.
- 521 34. Seemann T. Abriicate. Github.
- 522 35. Altschul SF, Gish W, Miller W, Myers EW, Lipman DJ. 1990. Basic local alignment search tool. *J*  
523 *Mol Biol* 215:403–410.
- 524 36. Nakamura T, Yamada KD, Tomii K, Katoh K. 2018. Parallelization of MAFFT for large-scale  
525 multiple sequence alignments. *Bioinformatics* 34:2490–2492.
- 526 37. Nguyen L-T, Schmidt HA, von Haeseler A, Minh BQ. 2015. IQ-TREE: a fast and effective  
527 stochastic algorithm for estimating maximum-likelihood phylogenies. *Mol Biol*

- 528           Evol2014/11/03. 32:268–274.
- 529   38.    Letunic I, Bork P. 2019. Interactive Tree Of Life (iTOL) v4: recent updates and new  
530           developments. *Nucleic Acids Res* 47:W256–W259.
- 531   39.    GitHub - simroux/ClusterGenomes: Archive for ClusterGenomes scripts.
- 532   40.    Team RC. 2018. R: A language and environment for statistical computing. R Foundation for  
533           Statistical Computing, Vienna.
- 534   41.    Oksanen J, Guillaume Blanchet F, Friendly M, Kindt R, Legendre P, McGlenn D, Minchin PR,  
535           O’Hara RB, Simpson GL, Solymos P, Stevens M henry H, Szoecs E, Wagner H. 2020. vegan:  
536           Community Ecology Package.
- 537   42.    Rihtman B, Meaden S, Clokie MRJ, Koskella B, Millard AD, Rihtman B Clokie MRJ, Koskella B,  
538           Millard AD. MS. 2016. Assessing Illumina technology for the high-throughput sequencing of  
539           bacteriophage genomes. *PeerJ* 4:e2055.
- 540   43.    Adriaenssens EM, Rodney Brister J. 2017. How to name and classify your phage: An informal  
541           guide. *Viruses* 9:1–9.
- 542   44.    Pepin KM, Wichman HA. 2008. Experimental evolution and genome sequencing reveal  
543           variation in levels of clonal interference in large populations of bacteriophage  $\phi$ X174. *BMC*  
544           Evol Biol <https://doi.org/10.1186/1471-2148-8-85>.
- 545   45.    Hatfull GF, Pedulla ML, Jacobs-Sera D, Cichon PM, Foley A, Ford ME, Gonda RM, Houtz JM,  
546           Hryckowian AJ, Kelchner VA, Namburi S, Pajcini K V., Popovich MG, Schleicher DT, Simanek  
547           BZ, Smith AL, Zdanowicz GM, Kumar V, Peebles CL, Jacobs WR, Lawrence JG, Hendrix RW.  
548           2006. Exploring the mycobacteriophage metaproteome: Phage genomics as an educational  
549           platform. *PLoS Genet* <https://doi.org/10.1371/journal.pgen.0020092>.
- 550   46.    Bailly-Bechet M, Vergassola M, Rocha E. 2007. Causes for the intriguing presence of tRNAs in  
551           phages. *Genome Res*2007/09/04. 17:1486–1495.
- 552   47.    Yuan Y, Gao M. 2017. Jumbo bacteriophages: An overview. *Front Microbiol*  
553           <https://doi.org/10.3389/fmicb.2017.00403>.



- 554 48. Daly MM, Doktor S, Flamm R, Shortridge D. 2004. Characterization and prevalence of MefA,  
555 MefE, and the associated msr(D) gene in *Streptococcus pneumoniae* clinical isolates. *J Clin*  
556 *Microbiol* 42:3570–3574.
- 557 49. Zhou Z, Alikhan NF, Mohamed K, Fan Y, Achtman M. 2020. The EnteroBase user’s guide, with  
558 case studies on *Salmonella* transmissions, *Yersinia pestis* phylogeny, and *Escherichia core*  
559 *genomic diversity*. *Genome Res* 30:138–152.
- 560 50. Hanauer DI, Graham MJ, Betancur L, Bobrownicki A, Cresawn SG, Garlena RA, Jacobs-Sera D,  
561 Kaufmann N, Pope WH, Russell DA, Jacobs WR, Sivanathan V, Asai DJ, Hatfull GF. 2017. An  
562 inclusive Research Education Community (iREC): Impact of the SEA-PHAGES program on  
563 research outcomes and student learning. *Proc Natl Acad Sci U S A* 114:13531–13536.
- 564 51. M. Iyer L, Anantharaman V, Krishnan A, Burroughs AM, Aravind L. 2021. Jumbo Phages: A  
565 Comparative Genomic Overview of Core Functions and Adaptions for Biological Conflicts.  
566 *Viruses* .
- 567 52. Enault F, Briet A, Bouteille L, Roux S, Sullivan MB, Petit MA. 2017. Phages rarely encode  
568 antibiotic resistance genes: A cautionary tale for virome analyses. *ISME J* 11:237–247.
- 569 53. Debroas D, Siguret C. 2019. Viruses as key reservoirs of antibiotic resistance genes in the  
570 environment. *ISME J* 13:2856–2867.
- 571
- 572



Figure 1

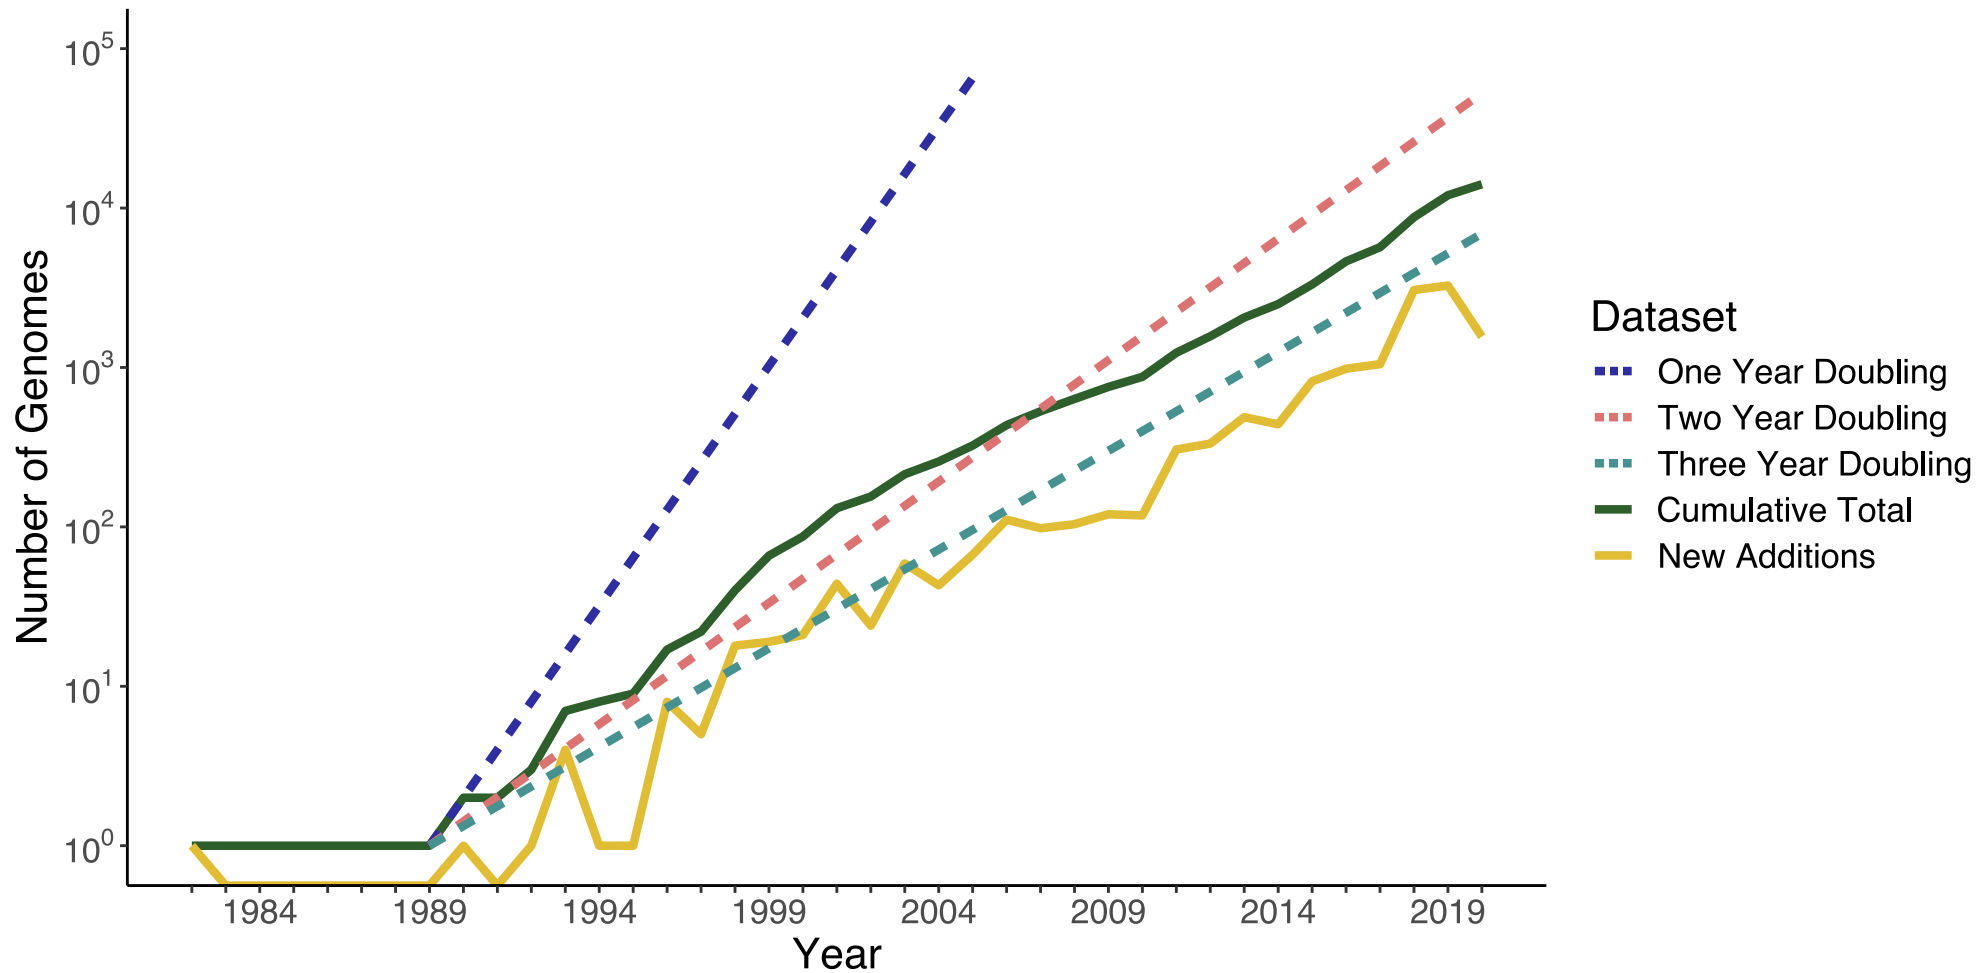

Figure 2  
A

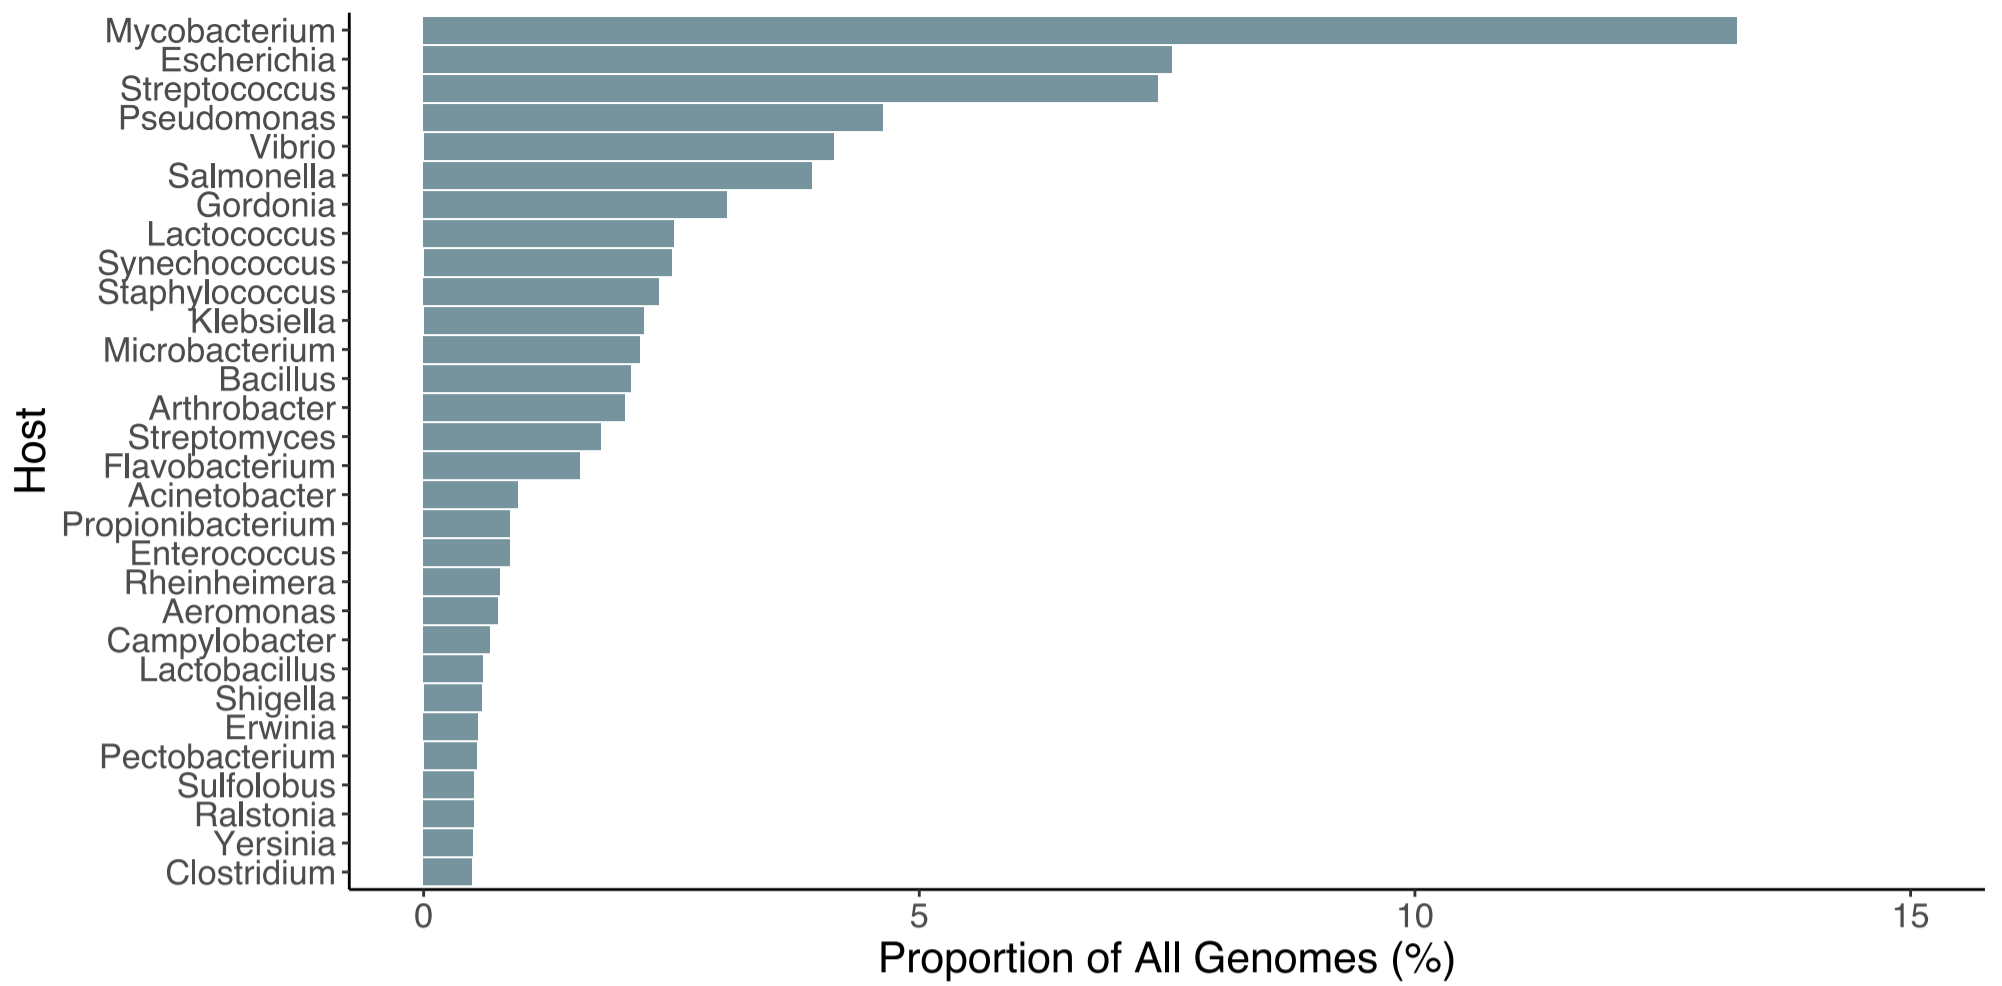

B

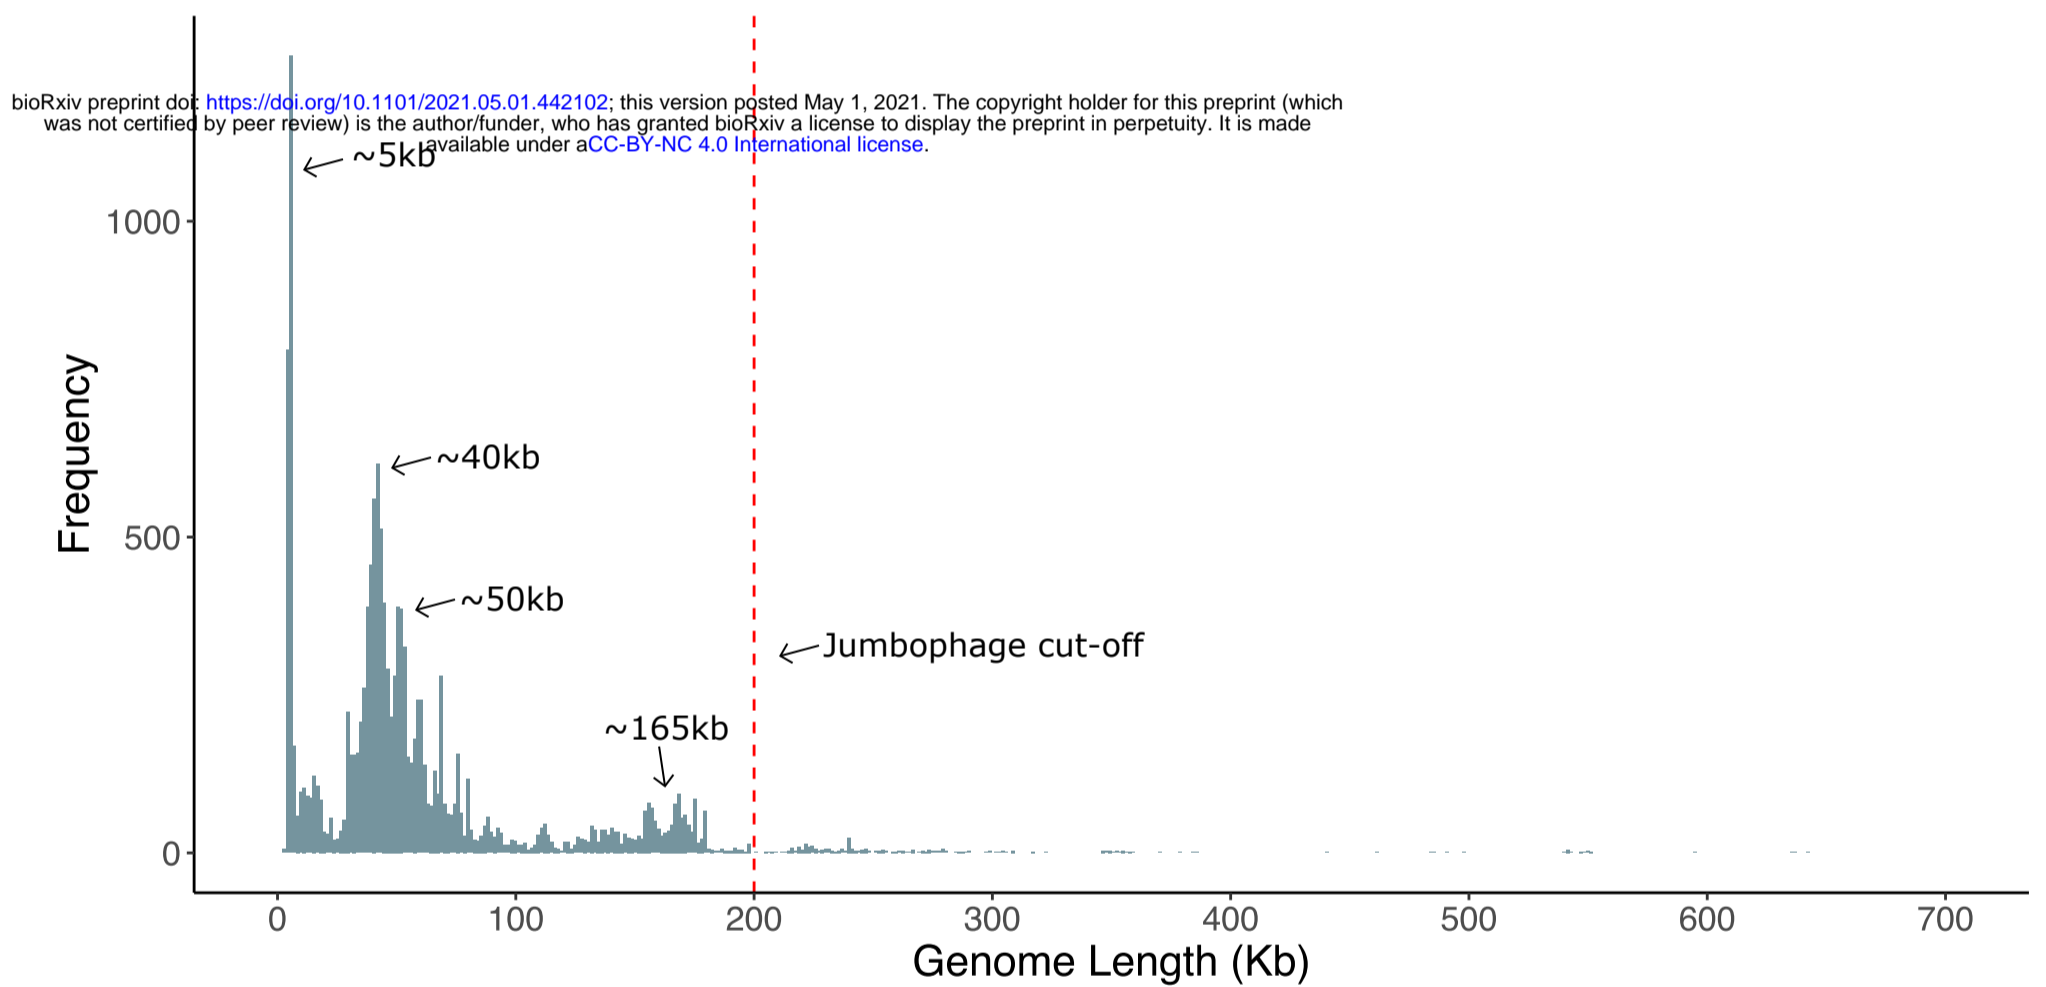

C

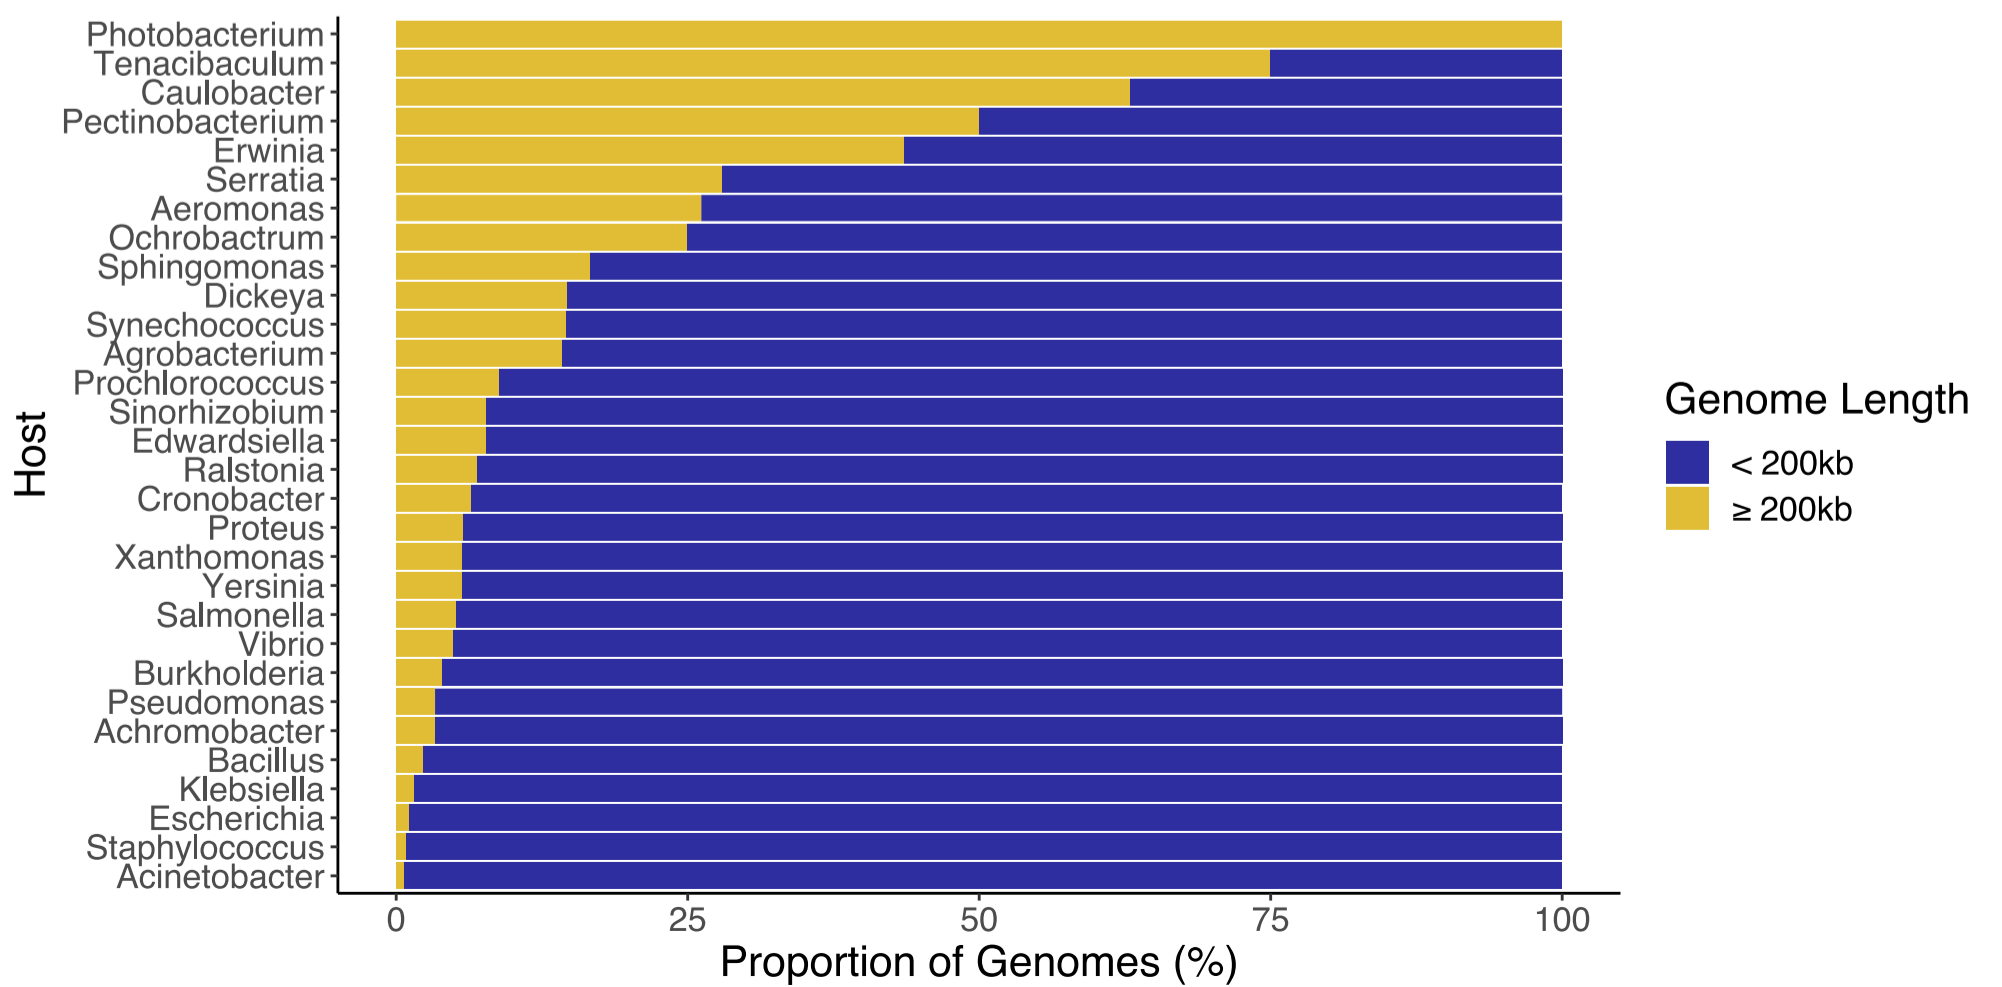

A Figure 3

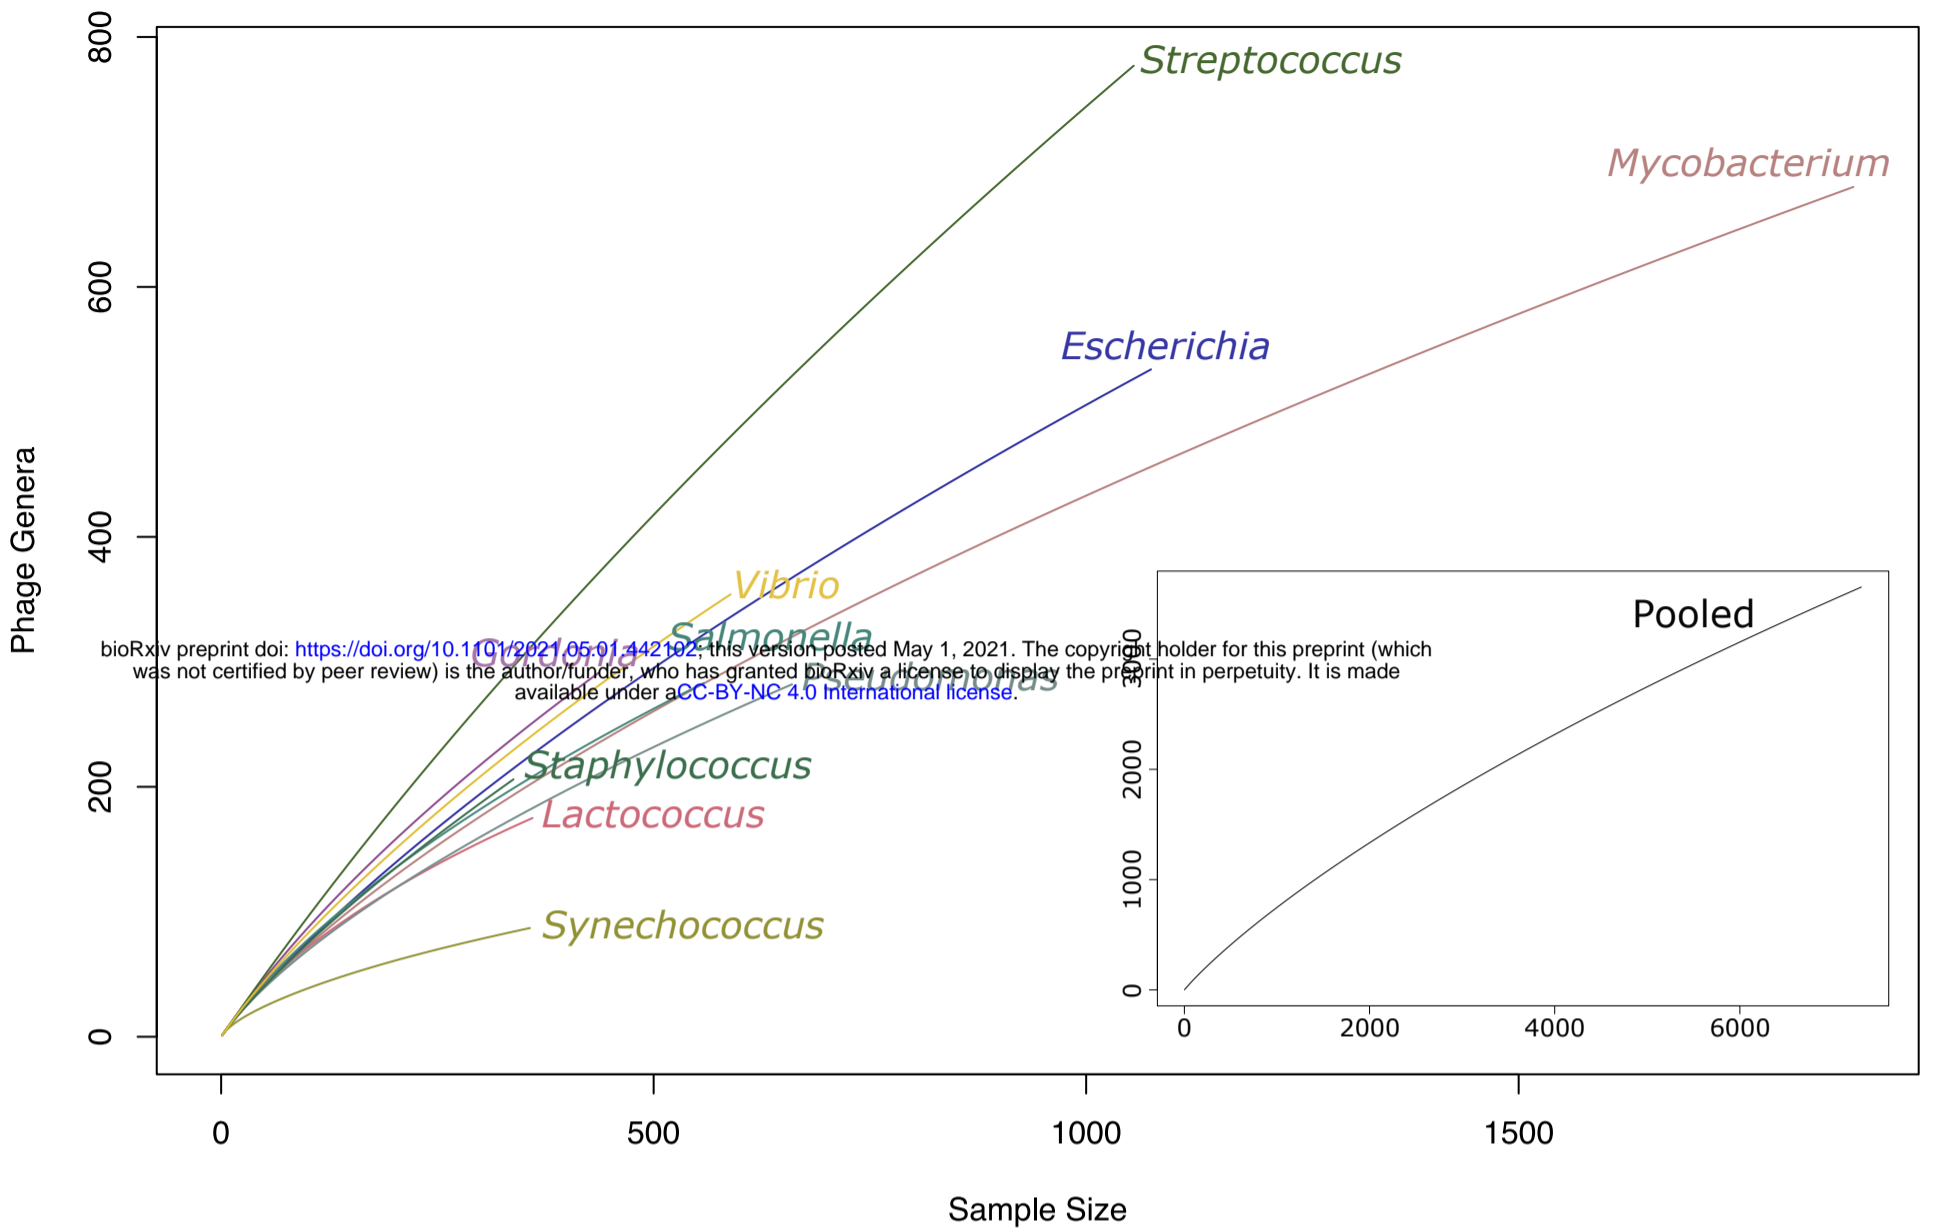

B

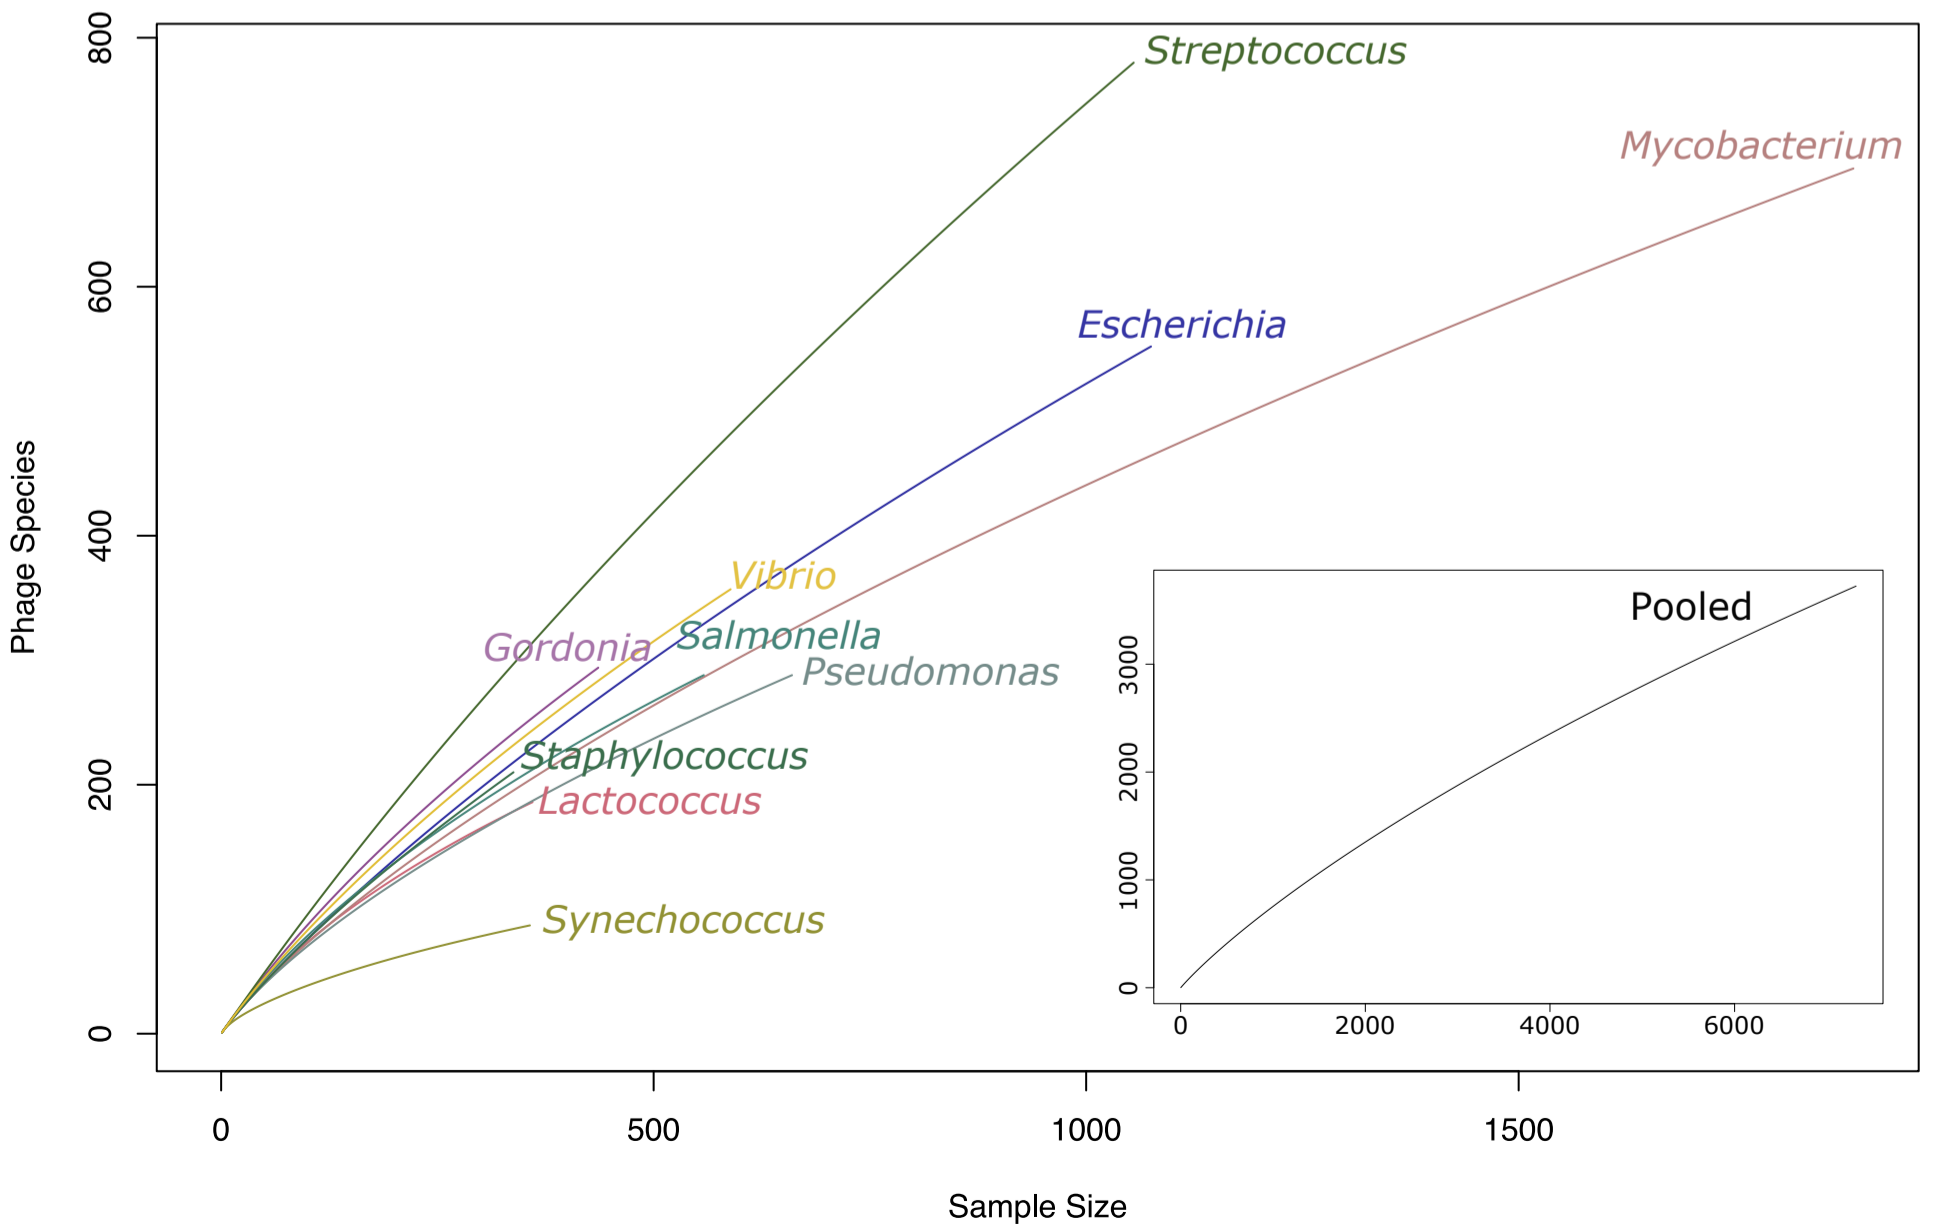

Tree scale: 1 

Figure 4

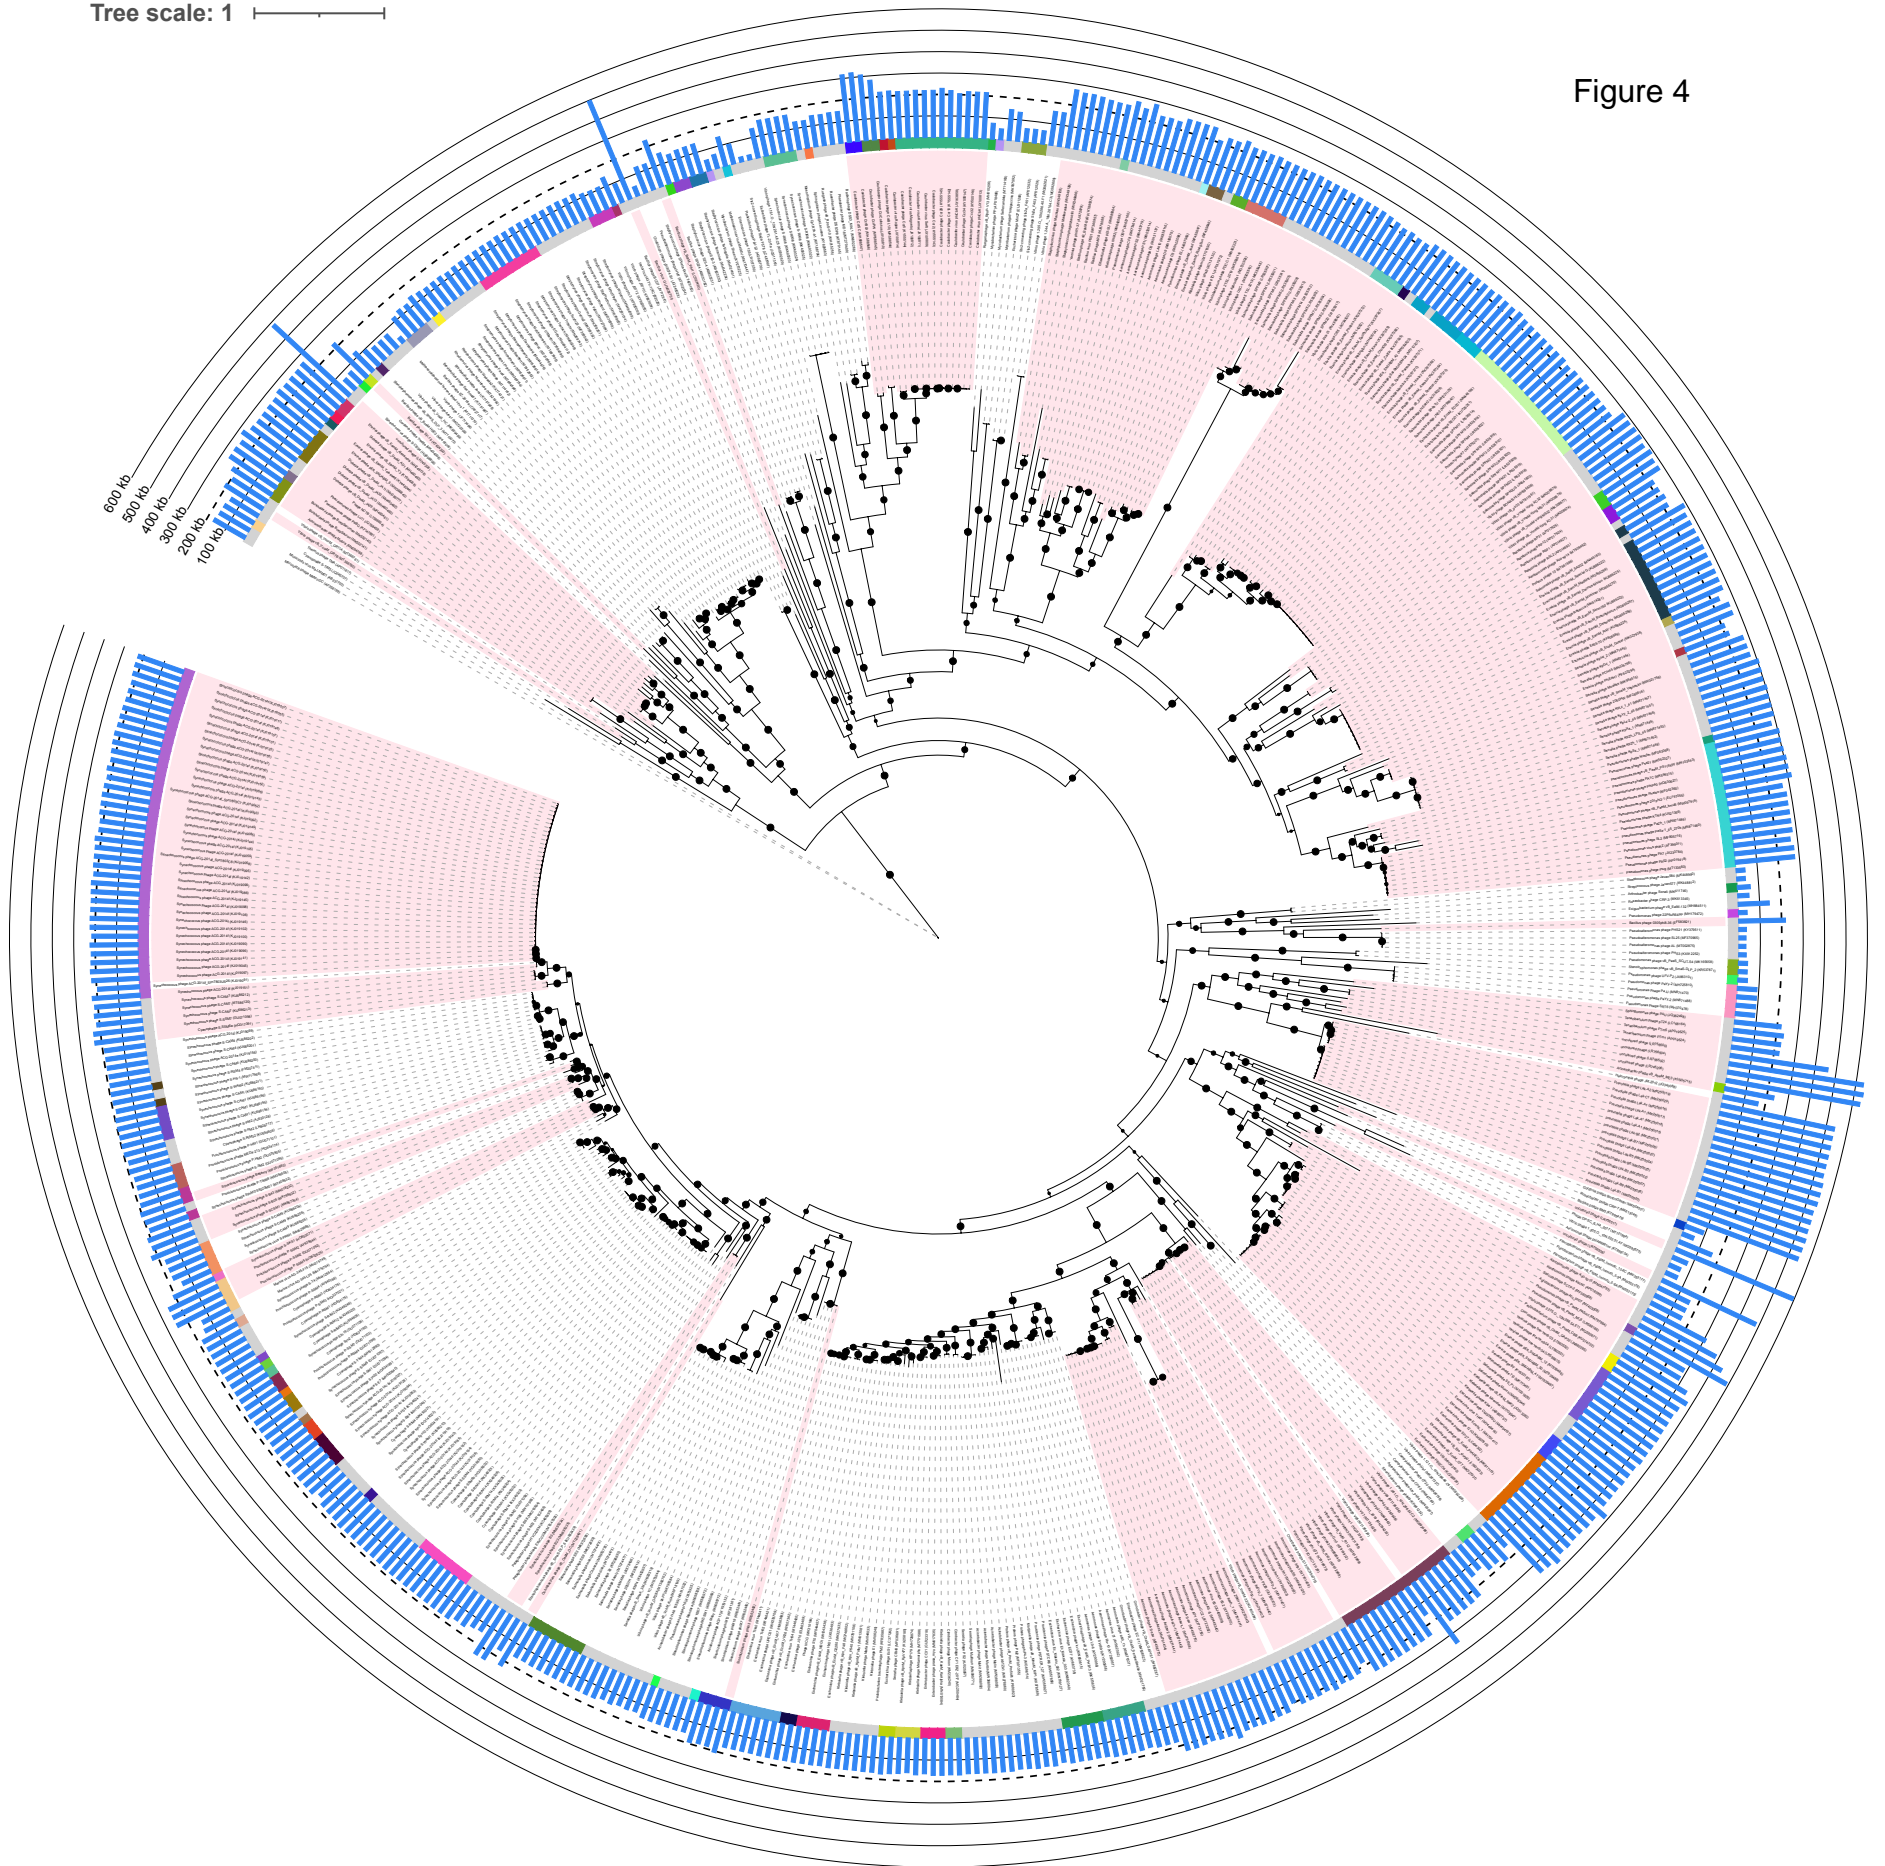

Figure S1

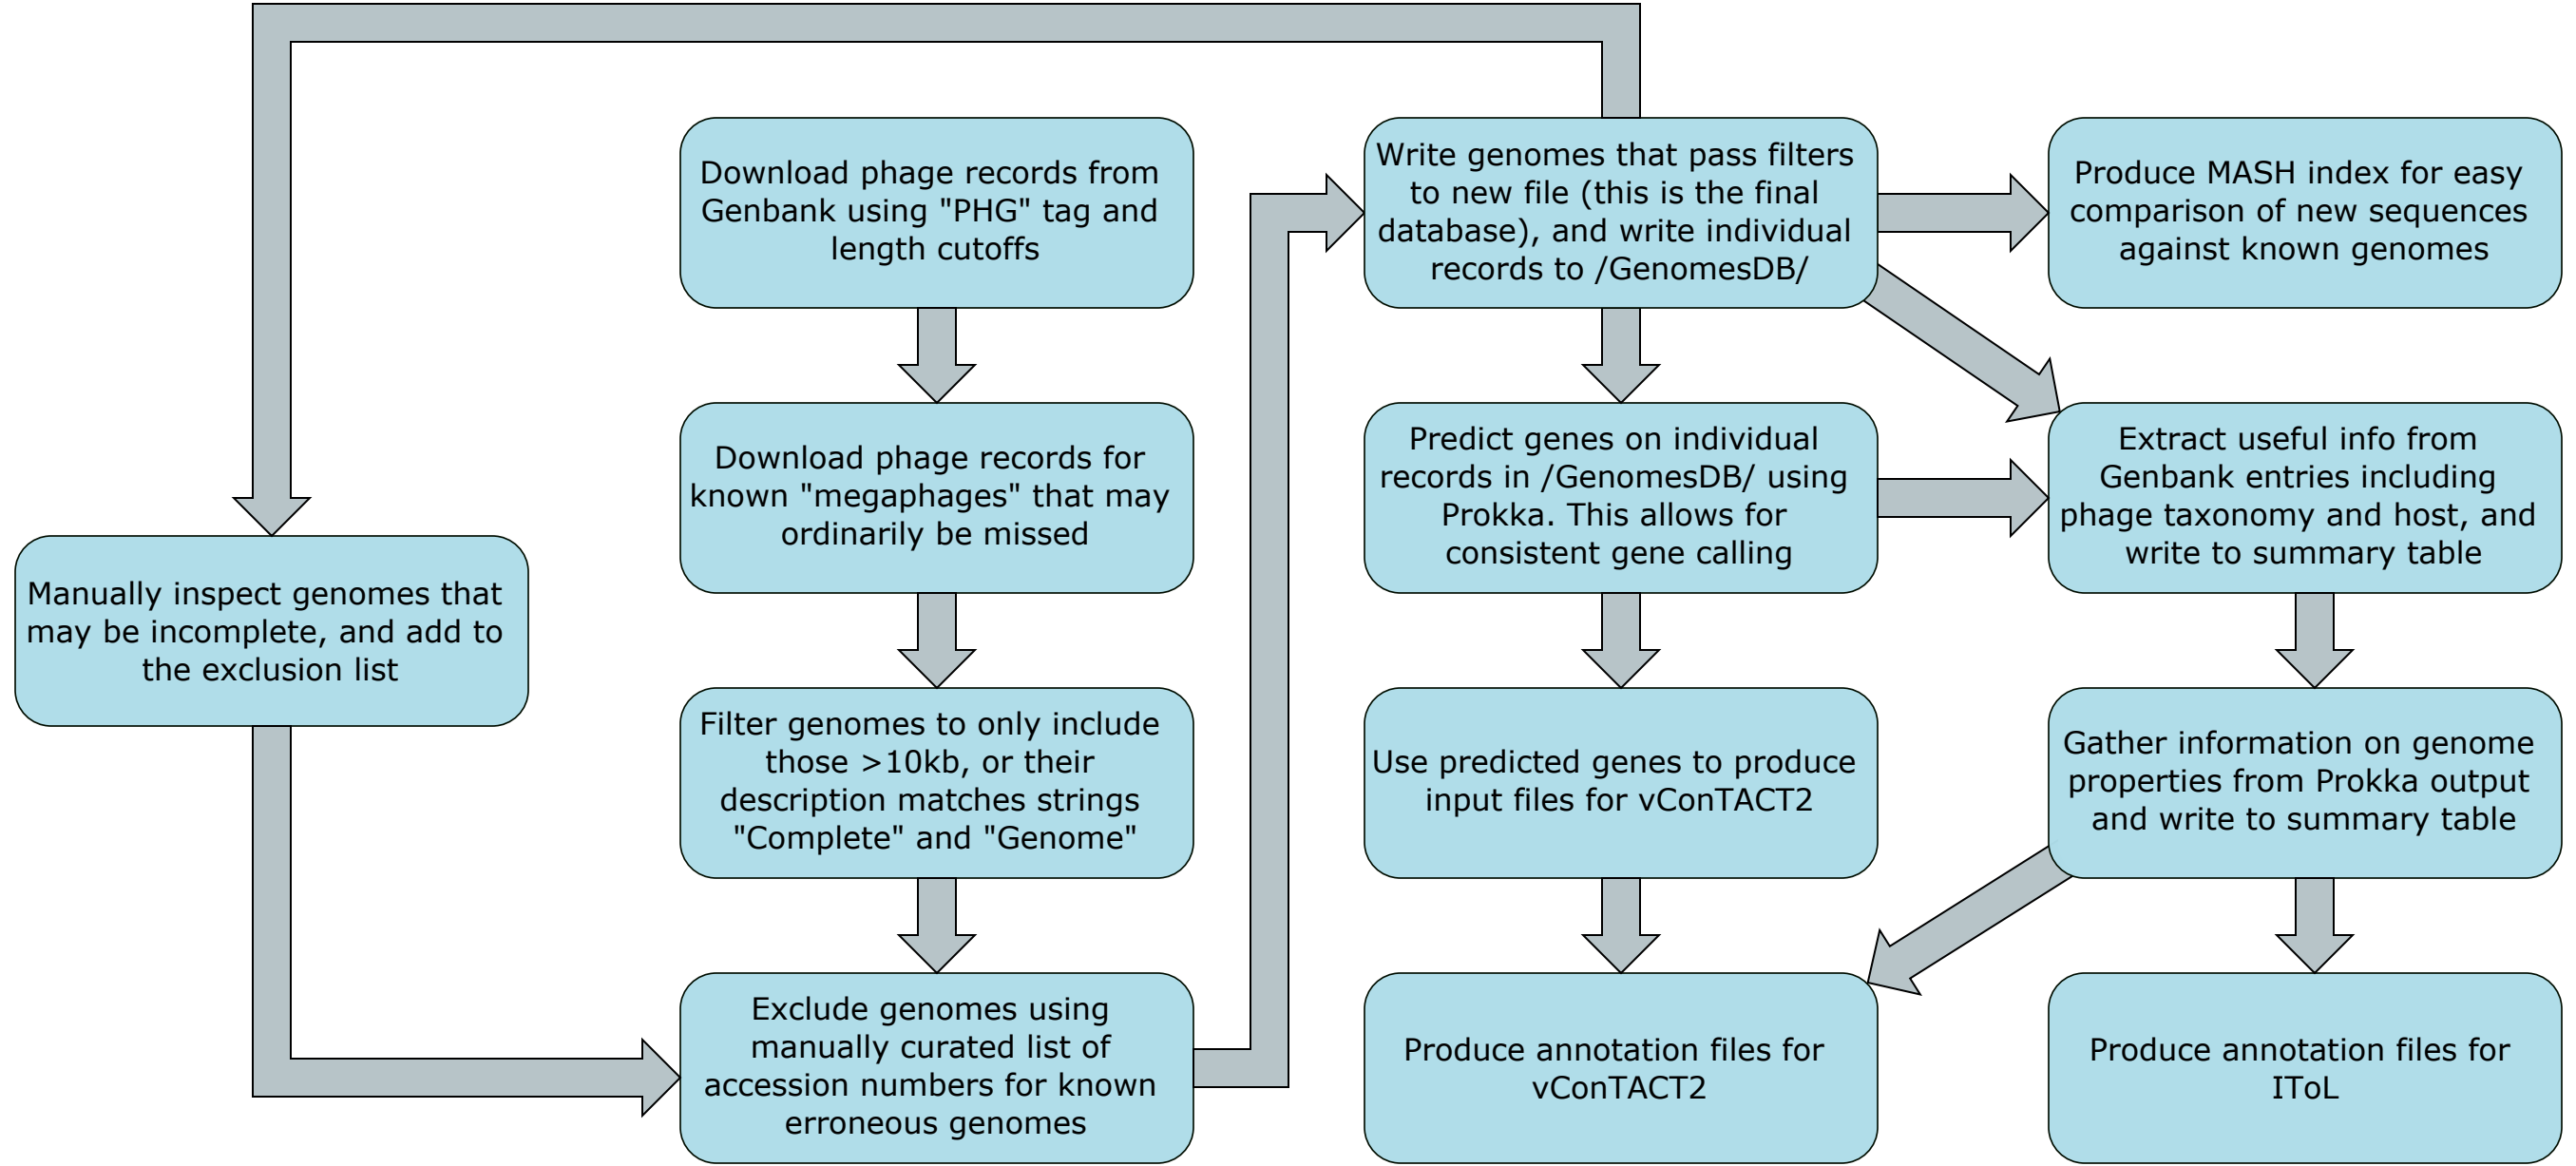

Figure S2

A

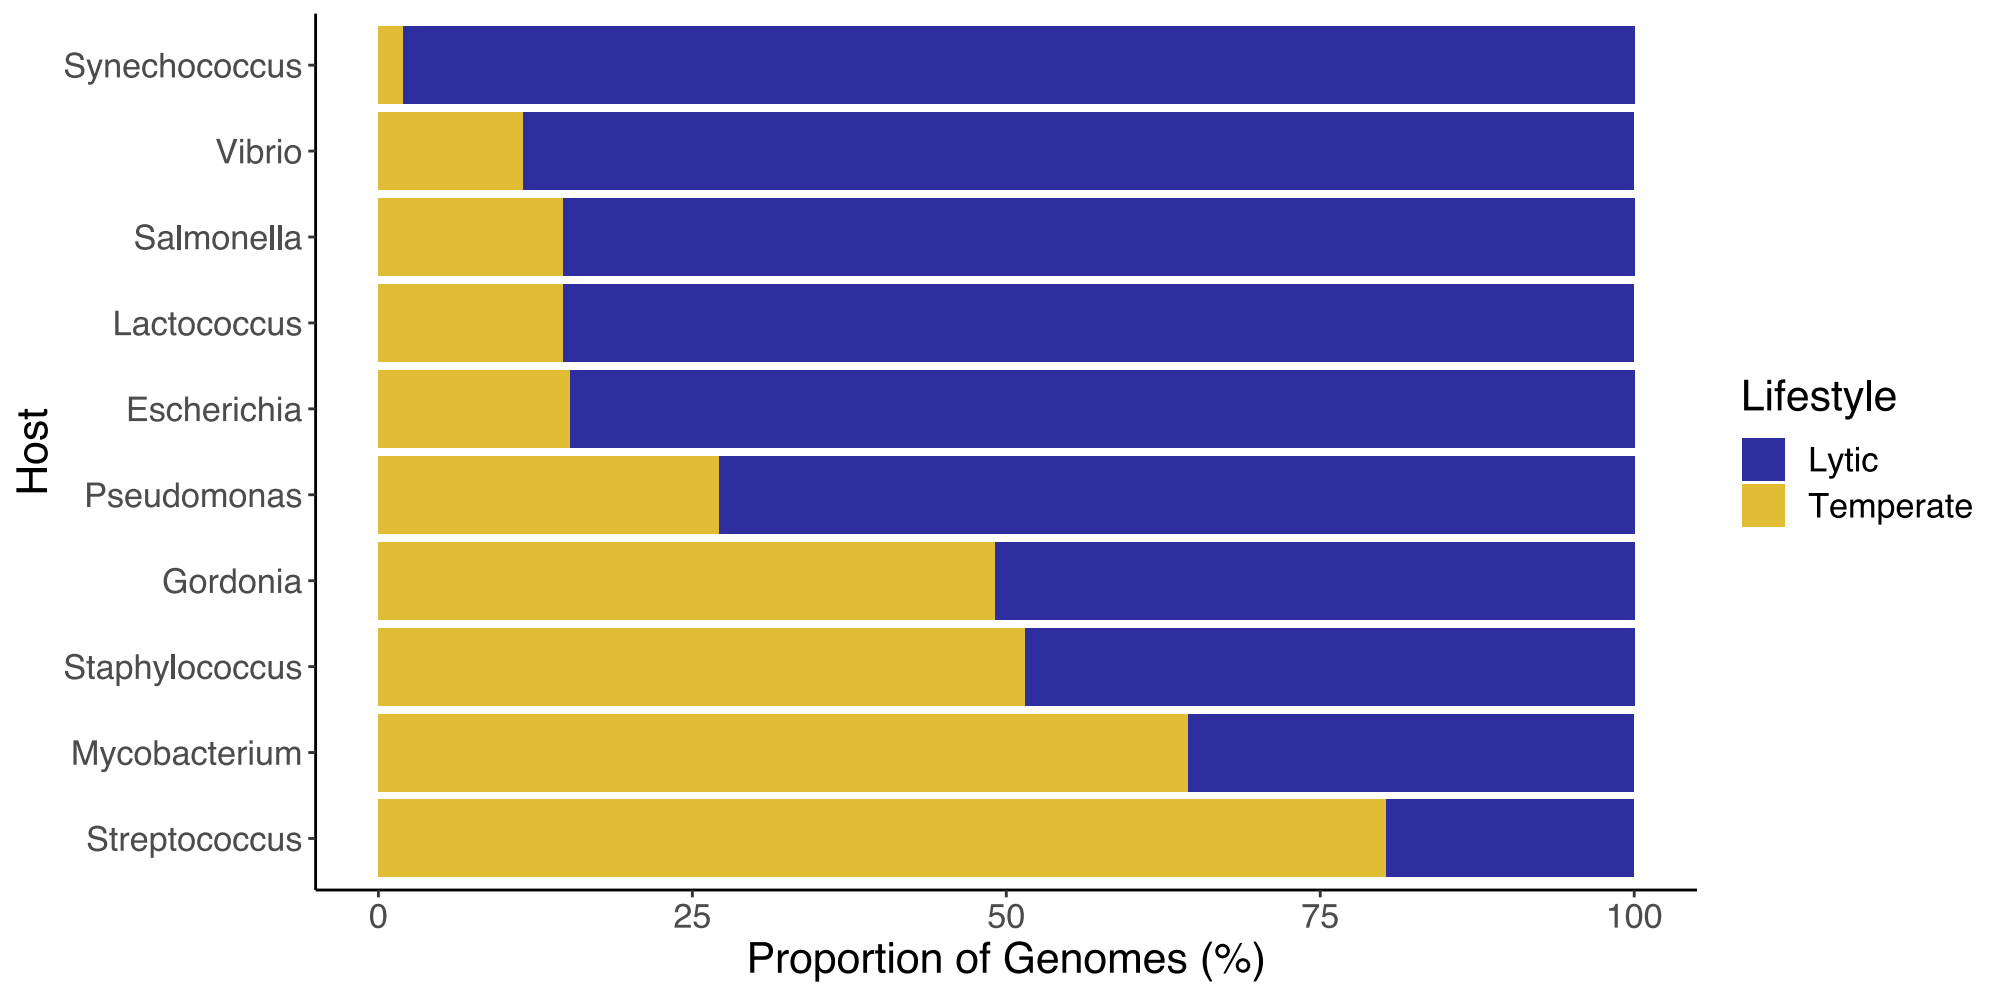

B

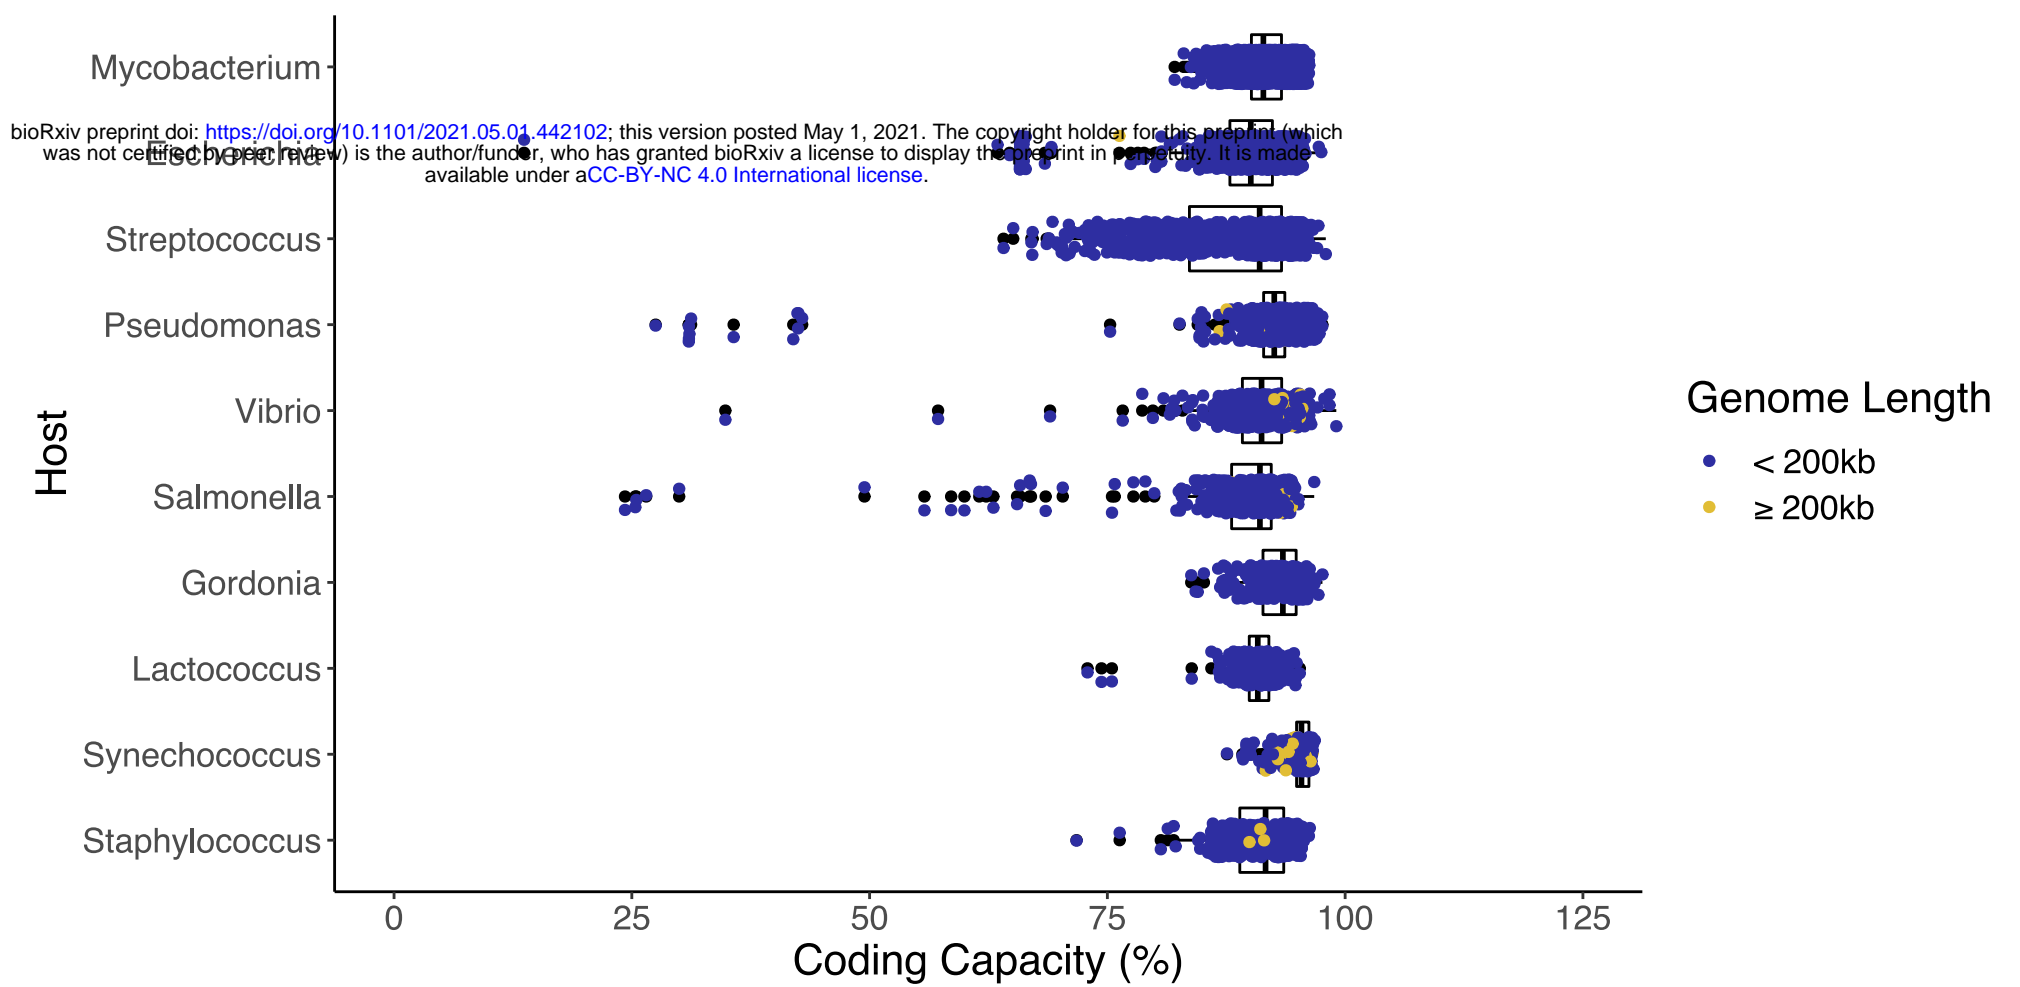

C

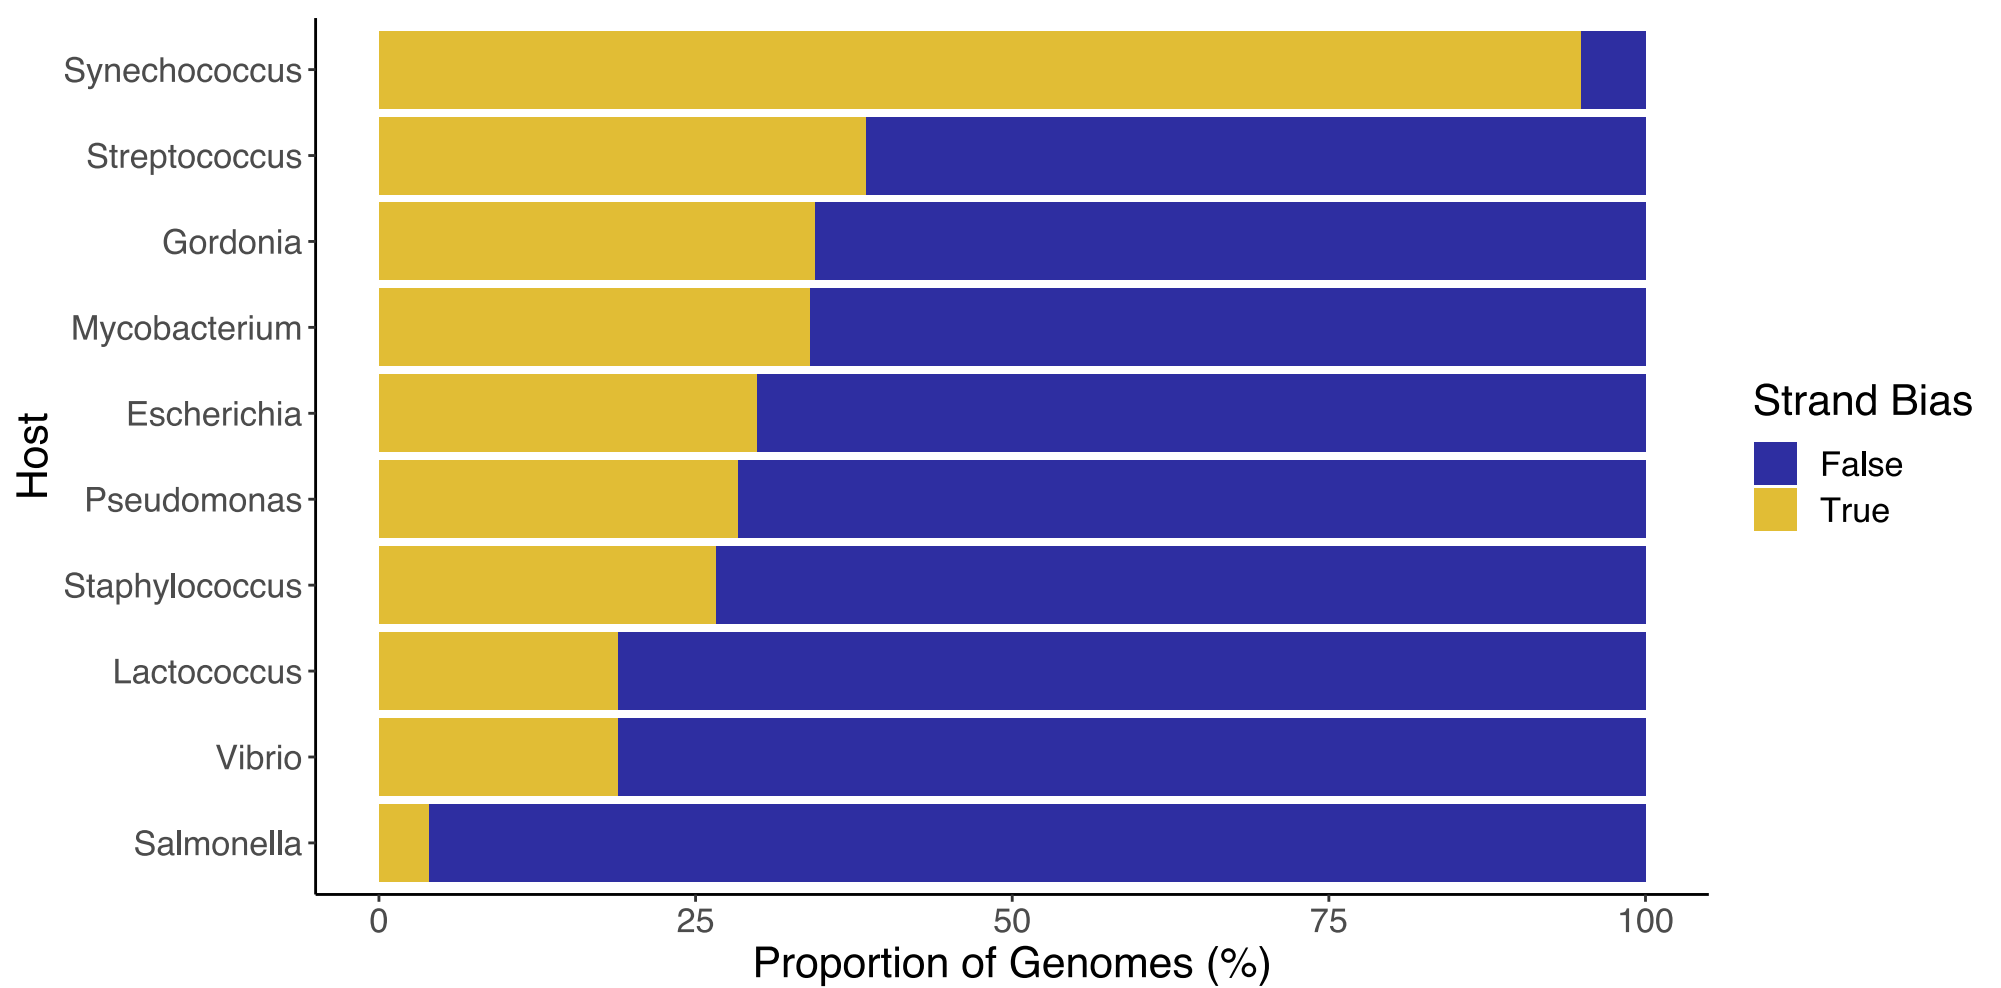



Figure S3

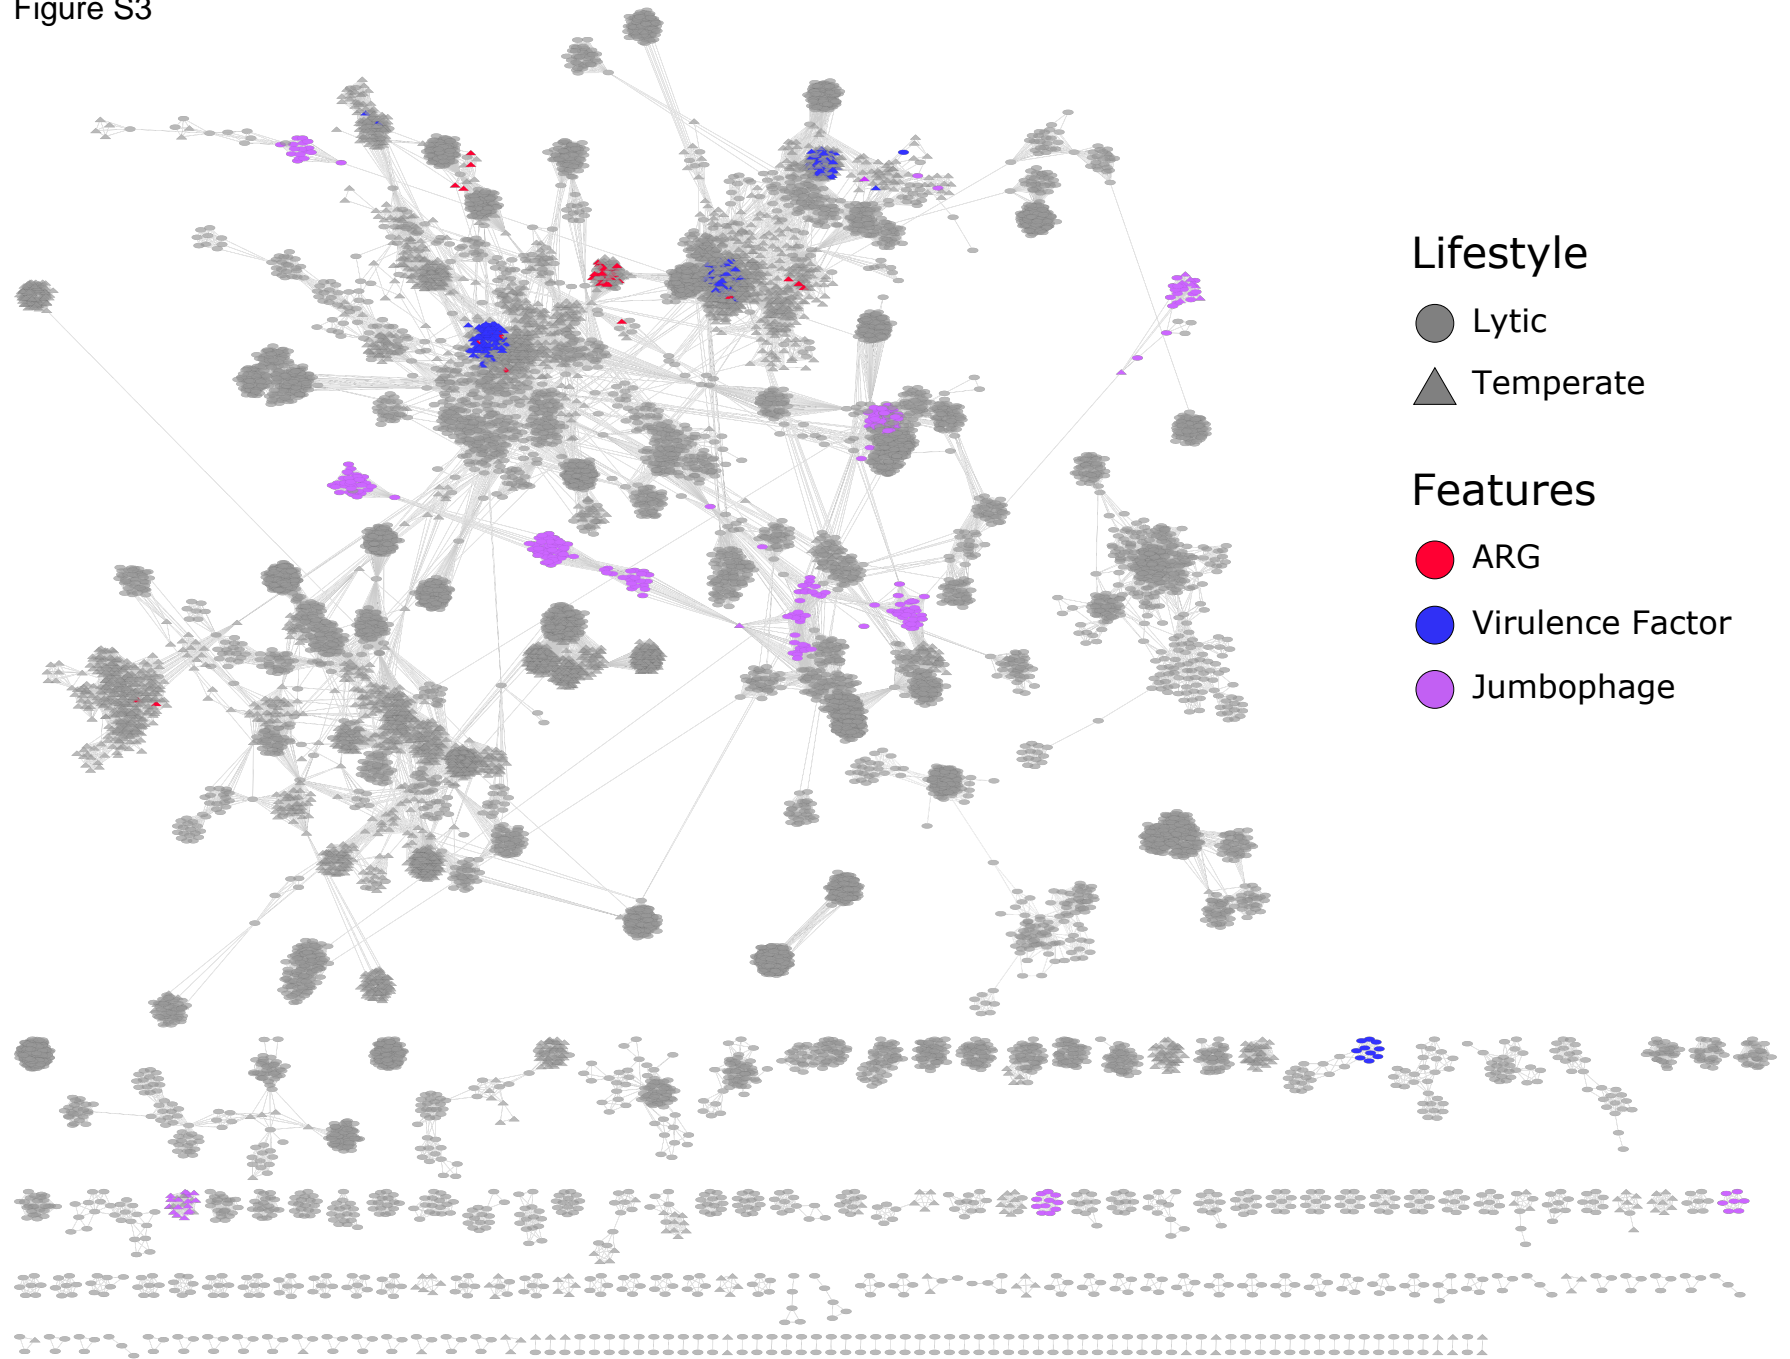

Source: http://biorxiv.org/content/10.1101/2021.05.01.442102v1.full.pdf
